1 **Mild SARS-CoV-2 infection in rhesus macaques is associated**

2 **with viral control prior to antigen-specific T cell responses in tissues**

3  
4 Christine E. Nelson<sup>1</sup>, Sivaranjani Namasivayam<sup>2</sup>, Taylor W. Foreman<sup>1</sup>, Keith D.

5 Kauffman<sup>1</sup>, Shunsuke Sakai<sup>1</sup>, Danielle E. Dorosky<sup>1</sup>, Nickiana E. Lora<sup>1</sup>, NIAID/DIR

6 Tuberculosis Imaging Program<sup>3</sup>, Kelsie Brooks<sup>4</sup>, E. Lake Potter<sup>5</sup>, Mario Roederer<sup>5</sup>, Alan

7 Sher<sup>2</sup>, Daniela Weiskopf<sup>6</sup>, Alessandro Sette<sup>6,7</sup>, Emmie de Wit<sup>8</sup>, Heather D. Hickman<sup>9</sup>,

8 Jason M. Brenchley<sup>4</sup>, Laura E. Via<sup>10,11</sup>, Daniel L. Barber<sup>1,\*</sup>

9  
10 <sup>1</sup>T lymphocyte Biology Section, Laboratory of Parasitic Diseases, National Institutes of  
11 Allergy and Infectious Disease, National Institutes of Health, Bethesda, MD, USA;

12 <sup>2</sup>Immunobiology Section, Laboratory of Parasitic Diseases, National Institutes of Allergy  
13 and Infectious Disease, National Institutes of Health, Bethesda, MD, USA;

14 <sup>3</sup>Division of Intramural Research, National Institutes of Allergy and Infectious Disease,  
15 National Institutes of Health, Bethesda, MD, USA;

16 <sup>4</sup>Barrier Immunity Section, Laboratory of Viral Diseases, National Institutes of Allergy and  
17 Infectious Disease, National Institutes of Health, Bethesda, MD, USA;

18 <sup>5</sup>ImmunoTechnology Section, Vaccine Research Center, National Institutes of Allergy and  
19 Infectious Disease, National Institutes of Health, Bethesda, MD, USA;

20 <sup>6</sup>Center for Infectious Disease and Vaccine Research, La Jolla Institute for Immunology,  
21 La Jolla, CA 92037, USA;

22 <sup>7</sup>Department of Medicine, Division of Infectious Diseases and Global Public Health,  
23 University of California, San Diego (UCSD), La Jolla, CA 92037, USA;

24 <sup>8</sup>Laboratory of Virology, Division of Intramural Research, National Institutes of Allergy and  
25 Infectious Disease, National Institutes of Health, Hamilton, MT, USA;

26 <sup>9</sup>Viral Immunity and Pathogenesis Unit, Laboratory of Clinical Immunology and  
27 Microbiology, National Institutes of Allergy and Infectious Disease, National Institutes of  
28 Health, Bethesda, MD, USA;

29 <sup>10</sup>Tuberculosis Research Section, Laboratory of Clinical Infectious Diseases, National  
30 Institutes of Allergy and Infectious Disease, National Institutes of Health, Bethesda, MD,  
31 USA;

32 <sup>11</sup>Institute of Infectious Disease & Molecular Medicine and Division of Immunology,  
33 Department of Pathology, University of Cape Town, Observatory, South Africa.

34 \*Corresponding author: Daniel L. Barber, [barberd@niaid.nih.gov](mailto:barberd@niaid.nih.gov)

35

36 <sup>3</sup>Members of the NIAID/DIR Tuberculosis Imaging Program include: Ayan Abdi,  
37 Emmuanual K. Dayao, Joel D. Fleegle, Felipe Gomez, Michaela K. Piazza, Katelyn M.  
38 Repoli, Becky Y. Sloan, Ashley L. Butler, April M. Walker, Danielle M. Weiner, Michael J.  
39 Woodcock, and Alexandra Vattbauer.

40 **ABSTRACT**

41 SARS-CoV-2 primarily replicates in mucosal sites, and more information is needed about  
42 immune responses in infected tissues. We used rhesus macaques to model protective  
43 primary immune responses in tissues during mild COVID-19. Viral RNA levels were  
44 highest on days 1-2 post-infection and fell precipitously thereafter. <sup>18</sup>F-  
45 fluorodeoxyglucose (FDG)-avid lung abnormalities and interferon (IFN)-activated myeloid  
46 cells in the bronchoalveolar lavage (BAL) were found on days ~3-4. Virus-specific effector  
47 CD8 and CD4 T cells were detectable in the BAL and lung tissue on days ~7-10, after  
48 viral RNA, lung inflammation, and IFN-activated myeloid cells had declined. Notably,  
49 SARS-CoV-2-specific T cells were not detectable in the nasal turbinates, salivary glands,  
50 and tonsils on day 10 post-infection. Thus, SARS-CoV-2 replication wanes in the lungs  
51 prior to T cell responses, and in the nasal and oral mucosa despite the apparent lack of  
52 Ag-specific T cells, suggesting that innate immunity efficiently restricts viral replication  
53 during mild COVID-19.

54

55 **ONE SENTENCE SUMMARY**

56 SARS-CoV-2 infection leads to mild, focal lung inflammation, and type I IFN activated  
57 myeloid cells that mostly resolve prior to the influx of virus-specific effector T cells or  
58 antibody responses in rhesus macaques.

## 59 INTRODUCTION

60 SARS-CoV-2 infection has a spectrum of clinical outcomes, ranging from  
61 asymptomatic to fatal. There is a need to parse out the role of individual immune cell  
62 types and molecular pathways that contribute to effective control of viral infection in  
63 asymptomatic/mild disease and those leading to organ failure during severe COVID-19.  
64 Increased pro-inflammatory cytokines<sup>1-4</sup>, deficient type I interferon (IFN) responses<sup>5-7</sup>,  
65 activation of inflammasomes<sup>8</sup>, neutrophils<sup>9-11</sup>, and monocytes/macrophages<sup>1,2,11-14</sup> have  
66 all been associated with severe COVID-19. Coordinated activation of CD8 and CD4 T  
67 cells, T cell activation state, and antigen (Ag)-specificity have all been linked to favorable  
68 outcomes of SARS-CoV-2 infection<sup>15-20</sup>. While neutralizing antibodies are clearly  
69 protective in immune hosts, T cell responses may also contribute to the protection  
70 provided by vaccination and natural infection<sup>21-24</sup>.

71 Most studies of immune correlates of COVID-19 disease severity in humans have  
72 focused on sampling of peripheral blood. Nevertheless, some studies have observed  
73 infiltration of immune cells into the BAL fluid, post-mortem lung tissue acquired from fatal  
74 COVID-19 cases, or from individuals undergoing medically necessary  
75 procedures<sup>12,14,25,26</sup>. Notably, on autopsy several reports have observed a surprising lack  
76 of immune cells infiltrating into extrapulmonary tissues despite the presence of high  
77 levels of virus<sup>27-31</sup>. These data highlight the importance of understanding the early host  
78 response in pulmonary and extrapulmonary tissues in the first few days after SARS-CoV-  
79 2 infection.

80           Animal models can be employed to obtain a detailed understanding of the host  
81 response in infected tissues. Studies in SARS-CoV-2 susceptible species provide insights  
82 into COVID-19 disease pathogenesis. For example, transgenic mouse strains expressing  
83 human angiotensin converting enzyme (ACE)2 (K18-hACE2), and mice induced to  
84 express hACE2 with viral vectors, are highly susceptible to SARS-CoV-2 infection<sup>32-36</sup>.  
85 Syrian hamsters and ferrets are also moderately susceptible and shed infectious virus<sup>37-  
86 41</sup>. On the other hand, species more resistant to SARS-CoV-2 disease are useful tools in  
87 examining mechanisms of efficient control of viral replication. Several non-human primate  
88 (NHP) species can be experimentally infected with SARS-CoV-2<sup>42,43</sup>. Rhesus macaques,  
89 cynomolgus macaques, and African green monkeys typically develop mild signs after  
90 SARS-CoV-2 infection<sup>44-54</sup>. SARS-CoV-2 immune and vaccinated rhesus macaques are  
91 protected from reinfection primarily by neutralizing antibodies and to a lesser extent  
92 anamnestic T cell responses<sup>55-65</sup>. Thus, NHP are suitable for the study of protective host  
93 immune responses associated with mild SARS-CoV-2 infection.

94           In this study, we use the rhesus macaque model of mild COVID-19 to examine the  
95 (1) kinetics of lung inflammation using <sup>18</sup>FDG positron emission tomography computed  
96 tomography (PET/CT) imaging, (2) innate immune responses using single cell RNA  
97 sequencing (scRNAseq), and (3) the tissue distribution of SARS-CoV-2-specific T cell  
98 responses by flow cytometry. Our findings suggest that mild SARS-CoV-2 disease and  
99 efficient control of the infection are temporally correlated with activation of myeloid cells  
100 by type I IFN, prior to the induction of Ag-specific T and B cell responses. Moreover, they

- 101 reveal a strong propensity for Ag-specific T cell migration into the pulmonary compartment
- 102 compared to other mucosal sites of infection.

## 103 **RESULTS**

### 104 **Radiologic and virological outcomes of SARS-CoV-2 infection in rhesus macaques**

105 Six, male rhesus macaques were infected with SARS-CoV-2/USA-WA-1 at  $1 \times 10^6$   
106 tissue culture infectious dose (TCID)<sub>50</sub> intranasally (i.n.) and  $1 \times 10^6$  TCID<sub>50</sub> intratracheally  
107 (i.t.), for a total dose of  $2 \times 10^6$  TCID<sub>50</sub> (Table 1). <sup>18</sup>F<sup>18</sup>FDG PET/CT imaging showed evidence  
108 of heterogeneous inflammatory foci with increased <sup>18</sup>F<sup>18</sup>FDG uptake (Fig 1A, B) and lesion  
109 density (Fig 1A, C) in the lungs of 5 of 6 animals at day 3 post-infection, which resolved  
110 by day 9. Total genomic Nucleocapsid (gN) and subgenomic Nucleocapsid (sgN) RNA  
111 levels from nasal and throat swabs peaked 1 to 2 days post-infection and decreased to  
112 undetectable levels by day 7 to 10 (Fig 1D). Viral RNA was also found in the BAL of all  
113 animals at day 4 post-infection and was mostly cleared by day 7-10. It should be noted  
114 that day 4 post-infection likely does not represent the peak of viremia in the BAL, and  
115 previous studies indicate peak viral loads are reached at day 1 post infection in the BAL<sup>44</sup>.  
116 Viral RNA was essentially absent from plasma at all timepoints, consistent with previous  
117 reports<sup>44</sup>.

118 The animals were necropsied at day 10 post-infection for tissue analysis. A 3D  
119 reconstruction of the day 3 PET/CT images with conducting airways was used to locate  
120 and individually collect the previously PET hot lung regions and normal lung tissue  
121 separately. SARS-CoV-2 gN RNA was found on day 10 in all secondary lymphoid organs  
122 (SLO) and non-lymphoid tissues (NLT) tested, including the previously PET hot and  
123 normal lung tissue, nasal turbinates, salivary gland, and tonsils (Fig 1E). sgN RNA was  
124 present at lower levels compared to gN RNA, and was highest in lung tissue (Fig 1F). The

125 persistence of viral RNA at day 10, was confirmed with RNA scope immunohistochemical  
126 analysis (Fig 1G). There was a correlation between genomic and subgenomic RNA levels  
127 in the mucosal swabs, BAL, and tissues with detectable RNA (Fig S1A-C). We did not  
128 observe a correlation between lung lesion severity at day 3 and viral RNA levels from  
129 nasal swabs and BAL at day 1 and 4, respectively (Fig S1D-G). Consistent with previous  
130 reports in macaques, various forms of microthrombi were still detectable on day 10 post-  
131 infection (Fig 1H)<sup>45</sup>. Thus, in rhesus macaques SARS-CoV-2 viral loads peak ~1-2 days  
132 after exposure and this results in mild and transient radiographic evidence of lung  
133 inflammation at ~3 days post-infection, with residual viral RNA in tissues and  
134 microthrombi in the lungs at day 10.

135

### 136 **Longitudinal scRNAseq analysis of BAL and PBMC**

137 To compare cellular immune responses in circulation versus airways, single cell  
138 RNA sequencing was performed on cryopreserved peripheral blood mononuclear cells  
139 (PBMC) and BAL samples obtained prior to infection and at days 4, 7 and 10 post-  
140 infection. Uniform manifold approximation and projection (UMAP) and nearest neighbor  
141 clustering of PBMCs from all timepoints identified multiple myeloid and T/NK cell  
142 populations along with B cells, platelets, and a mixture of proliferating cells (Fig 2A). Due  
143 to PBMC isolation and cryopreservation, granulocyte populations were not accounted for  
144 in this study. Myeloid and T/NK cell populations were selected for subsequent clustering.  
145 We identified nine distinct T/NK cell subsets in PBMCs across all timepoints (Fig S2).  
146 Overall, we did not detect major alterations in the T/NK cell composition from PBMCs, but



147 at day 4 after infection, we did observe a drop in naïve CD8 T cells and an increase in  
148 central memory CD4<sup>+</sup> T cells (PBMC T/NK subpopulation 0 and 1, respectively) (Fig S2).  
149 Further clustering of myeloid cells identified seven distinct myeloid subsets in PBMCs (Fig  
150 2B-C). Most strikingly, there were major changes to CD14<sup>+</sup> monocytes after infection. At  
151 baseline, a subpopulation of CD14<sup>+</sup> monocytes expressing *PGTS2* (PBMC myeloid  
152 subpopulation 3) were predominant (Fig 2C-D). At day 4 post-infection, there was a  
153 dramatic loss of the *PGTS2*<sup>+</sup> monocytes with an accompanying increase in two  
154 inflammatory monocyte populations with IFN responsive gene signatures (PBMC myeloid  
155 subpopulation 0 and 1) (Fig 2C-F). PBMC myeloid population 1 had a more prominent  
156 expression pattern of IFN stimulated genes at day 4 as compared to PBMC myeloid  
157 population 0, i.e., *MX1*, *MX2*, *IFI6*, *IFI16*, *IFI27*, *ISG15*, and *OAS2*, although both  
158 populations showed evidence of response to IFN (Fig 2B,E-F). In contrast to the major  
159 changes in CD14<sup>+</sup> monocytes, CD16<sup>+</sup> monocytes (PBMC myeloid population 5) did not  
160 increase in relative abundance after infection (Fig 2B-D).

161 An increase in certain subsets of dendritic cell (DC)2 have been associated with  
162 moderate/severe disease in COVID-19 patients<sup>66,67</sup>. At day 4 post-infection we observed  
163 an increase in CD1c<sup>+</sup> conventional DC2s (cDC2<sup>68</sup>) (PBMC myeloid subpopulation 4),  
164 which contracted by day 10. Conventional DC1 cells (*XCR1*, *BATF3*-expressing PBMC  
165 myeloid population 6) were less abundant than cDC2s and changed relatively little in  
166 abundance during infection. The major alterations in the CD14<sup>+</sup> monocytes substantially  
167 declined by day 7 post-infection and returned to baseline levels by day 10 (Fig 2C-D).

168 The *PGTS2*-expressing monocytes that were lost at day 4 returned by day 10 post-  
169 infection, and did not show dramatic changes in gene expression (Fig 2C-D,G).

170 In the BAL multiple distinct T cell and myeloid populations were identified, along  
171 with proliferating cells, B cells, plasmacytoid DCs (pDC), MAST cells, and epithelial cells  
172 (Fig 3A). Further clustering of BAL T cells identified 5 populations of T cells (Fig S2D).  
173 The largest change was the appearance on day 4 of a population with a mixture of CD8  
174 and CD4 T cells that had a prominent IFN-stimulated gene signature (BAL T cell sub  
175 population 3) (Fig S2D-F). These IFN-activated T cells were no longer detectable by day  
176 7 post-infection. Further clustering of BAL myeloid cells revealed 10 distinct populations  
177 of myeloid cells (Fig 3B-C). At baseline, BAL cells were mostly comprised of multiple  
178 *MRC1*<sup>+</sup>*MARCO*<sup>+</sup> myeloid subsets (BAL myeloid subpopulations 0, 2, and 3) which are  
179 likely alveolar macrophages (Fig 3C). At day 4 post infection, there were major increases  
180 in populations of IFN-activated monocytes and macrophages in the BAL (BAL myeloid  
181 subpopulation 1 and 6), which declined by day 7 and returned to baseline levels by day  
182 10 (Fig 3B-D). At day 10 post-infection, the myeloid cells in the BAL were dominated by  
183 a population of *CD1c*<sup>+</sup> *cDC2s* (BAL myeloid sub population 4) (Fig 3C). The *cDC2* in the  
184 BAL had a pattern of differentially expressed genes that suggested that this population  
185 also responded to infection by upregulating type I IFN responsive genes at day 4 post-  
186 infection (Fig 3E). By day 10 the *cDC2* had down regulated the type I IFN genes and  
187 upregulated genes associated with responses to lipopolysaccharide (LPS), including  
188 additional chemokines and *IL1B*, as well as the macrophage markers *MRC1* and  
189 *MARCO*.

190 Correlation analysis revealed strong positive correlations between viral RNA levels  
191 in the BAL, nasal swabs, and throat swabs (Fig 3F). Viral RNA from BAL and nasal swabs  
192 was positively correlated with IFN-activated monocytes, macrophages, and T cells in the  
193 BAL. In contrast, PGTS2<sup>+</sup> monocytes and naïve CD8 T cells from PBMCs negatively  
194 correlated with viral RNA from nasal swabs and BAL. To ask if type I, II, or III IFN was the  
195 stimulus for the IFN gene signature observed in many cell subsets, we analyzed *IFNB1*,  
196 *IFNG*, and *IFNL1* gene expression across all cell types (Fig 3G). We found that *IFNB1*  
197 was upregulated at day 4 post-infection, the timepoint when IFN-activated immune cells  
198 were highest. Interestingly, *IFNG* and *IFNL1* showed a relative increase at day 10, when  
199 viral RNA had already decreased substantially. Across all cell types the most highly  
200 upregulated, statistically-significant IFN stimulated genes were those downstream of type  
201 I IFN signaling and showed a pattern of upregulation at day 4 post-infection. Together,  
202 these data indicated that SARS-CoV-2 infection induces a robust type I IFN-activated  
203 myeloid cell response in PBMC and BAL, which coincides with radiographic indications  
204 of inflammation and resolves along with viral RNA levels between day 7 to 10 post-  
205 infection.

206

### 207 **Early B cell responses to SARS-CoV-2 infection**

208 We measured multiple B cell subsets in PBMCs and BAL by flow cytometry,  
209 including resting naïve B cells (CD20<sup>+</sup>IgD<sup>+</sup>CD95<sup>-</sup>), activated naïve B cells  
210 (CD20<sup>+</sup>IgD<sup>+</sup>CD95<sup>+</sup>), germinal center B cells (GC B cells: CD20<sup>+</sup>IgD<sup>-</sup>BCL6<sup>+</sup>Ki67<sup>+</sup>),  
211 plasmablasts (CD20<sup>+</sup>IgD<sup>-</sup>BCL-6<sup>-</sup>CD38<sup>hi</sup>CD27<sup>+</sup>), and activated memory B cells

212 (CD20<sup>+</sup>IgD<sup>-</sup>BCL-6<sup>-</sup>CD95<sup>+</sup>) (Figs S3A-B). Activated memory B cells were further  
213 subdivided into IgM<sup>+</sup>, IgG<sup>+</sup>, IgA<sup>+</sup>, and isotype undefined. After infection, we observed a  
214 decrease in total B cells in PBMCs (Fig S3C), an increase of 2-3% in the proportion of  
215 activated naïve B cells from PBMC at day 4 and 7 (Fig S3D), and a decrease in the overall  
216 proportion of activated B cells in PBMCs that are isotype undefined (Fig S3E). At  
217 necropsy, the frequency of B cells varied across tissues. While the spleen had the largest  
218 fraction of B cells, the BAL and lung had the highest proportion of activated memory B  
219 cells (Fig S3D-G). Anti-spike IgM and IgG were detectable in the plasma and BAL at day  
220 10 post-infection in most animals, although levels were only <2 fold above background  
221 (Fig S3I-K). Overall, we detected very few changes in B cell populations, and antibody  
222 responses were just becoming detectable by day 10 post-infection.

223

## 224 **Kinetics of SARS-CoV-2-specific effector CD8 and CD4 T cell responses in the BAL** 225 **and PBMC**

226 We next performed a flow cytometric analysis of the Ag-specific T cell response to  
227 SARS-CoV-2. We observed only minor changes in the activation of bulk T cell responses  
228 in the PBMC after infection, with more dynamic changes in the BAL after infection (Fig  
229 S4A-B). To examine SARS-CoV-2-specific T cell responses, we performed intracellular  
230 cytokine staining after *ex vivo* restimulation with peptide pools from the viral spike (S),  
231 nucleocapsid (N), and membrane (M) proteins, as well as peptide pools (megapools)  
232 derived from multiple SARS-CoV-2 antigens found to be immunogenic in humans<sup>69,70</sup>. As  
233 expected, Ag-specific T cell responses were not detected at day 4 post-infection in

234 PBMCs or BAL (Fig4A-D). CD4 T cell responses to S, N, and megapool, each reached  
235 ~4-6% on average by day 7, whereas Ag-specific CD8 T cells were ~1% at this timepoint  
236 in the BAL(Fig 4B,D). Consistent with a slightly delayed response, Ag-specific CD8 T cells  
237 in the BAL continued to expand in frequency and maintained Ki67 expression between  
238 days 7 and 10 post-infection, while Ag-specific CD4 T cells peaked in frequency at day 7  
239 and decreased Ki67 expression between days 7 and 10 (Fig 4D-E). Of note, frequencies  
240 of Ag-specific T cells were ~10 to 20-fold higher in the BAL vs. PBMC. Moreover, CD8  
241 and CD4 T cell responses against S and N were consistently immunodominant in  
242 comparison to M-specific T cells.

243 In addition to producing IFN $\gamma$  and TNF after peptide stimulation, the majority of Ag-  
244 specific CD8 T cells in the BAL also expressed granzyme B and degranulated after  
245 restimulation, as indicated by CD107a/b surface staining (Fig 4F). Approximately 25-60%  
246 of Ag-specific CD4 T cells in the BAL also made IL-2. Furthermore, both CD8 and CD4  
247 Ag-specific T cells in the BAL upregulated markers of tissue residence, CD69 and CD103,  
248 between days 7 and 10 post infection (Fig S4C-D). Thus, SARS-CoV-2-specific CD8 and  
249 CD4 T cells in the airways displayed typical effector functions associated with CTL and  
250 Th1 cells, respectively.

251

## 252 **Distribution of SARS-CoV-2-specific CD8 and CD4 T cell responses in mucosal** 253 **tissues**

254 At the day 10 necropsy, we examined SLO and NLT from the upper and lower  
255 respiratory tract for bulk and Ag-specific T cells. Tissue resident memory CD8 and CD4

256 T cells (CD95<sup>+</sup>CD69<sup>+</sup>CD103<sup>+/-</sup>) were detected in all nonlymphoid tissues measured,  
257 including the lung, nasal turbinates, salivary glands, and tonsils (Fig 5A-B). CD103<sup>+</sup> Trm  
258 were more abundant among CD8 compared to CD4 T cells in the BAL, salivary glands,  
259 and lymph nodes, which has been shown in other model systems<sup>71,72</sup>. Using intravenous  
260 (i.v.) antibody staining to distinguish between tissue parenchymal and intravascular  
261 cells<sup>73-75</sup>, we confirmed that most cells in the BAL, nasal turbinates, salivary gland, tonsils,  
262 and lymph nodes were from the tissue parenchyma (Fig S5). As expected for such a  
263 highly vascularized tissue, most cells from the lung tissue were intravascular stain  
264 positive, but a small population of CD69<sup>+</sup>iv<sup>-</sup> cells were detectable in the lungs confirming  
265 that tissue resident cells were also detected in pulmonary tissue. We next quantified the  
266 magnitude of SARS-CoV-2-specific T cells in each of these tissues. S, N, and megapool-  
267 specific CD8 and CD4 T cells were detected in the BAL, previously PET hot lung lesions,  
268 pulmonary lymph nodes, peripheral lymph nodes, spleen, and PBMC (i.e. the frequency  
269 of IFN $\gamma$ <sup>+</sup> and/or TNF<sup>+</sup> cells after peptide restimulation was statistically significantly higher  
270 than the unstimulated samples). Surprisingly, Ag-specific CD8 and CD4 T cell responses  
271 could not be detected in the majority of nasal turbinates, salivary gland, and tonsils (Fig  
272 5C). The absence of Ag-specific T cells cannot be accounted for by poor T cell isolation  
273 from tissues (Figure 5A-B) or lack of virus replication at these sites (Fig 1D-F). Thus, the  
274 early clonal burst of SARS-CoV-2-specific T cells is highly skewed toward the BAL and  
275 unexpectedly undetectable in the nasal and oral mucosa.

276 Overall, the kinetics of SARS-CoV-2 replication and innate/adaptive immune  
277 response in rhesus macaques appears typical of an acute viral infection (Fig 5D). SARS-

278 CoV-2 replication peaks within 1 to 2 days post-infection and rapidly decreases thereafter.  
279 IFN-responsive myeloid responses are rapidly detected in the PBMC and BAL at day 4  
280 post-infection. Innate immune responses and lung inflammation decline by day 7 post-  
281 infection, as Ag-specific T cells begin to accumulate in the airways.

## 282 **DISCUSSION**

283 We show here that during mild COVID-19 in rhesus macaques, SARS-CoV-2  
284 replication is largely suppressed prior to the induction of virus-specific T cell responses.  
285 PET/CT imaging showed regions of ground glass opacity and consolidation with elevated  
286 <sup>18</sup>F<sub>2</sub> uptake in the lungs on day 3 after SARS-CoV-2 infection, which completely  
287 resolved by day 9. A longitudinal scRNAseq analysis identified early type I IFN responsive  
288 monocyte, macrophage, and dendritic cells in PBMC and BAL that mostly dissipated prior  
289 to the arrival of virus-specific CD8 and CD4 T cells. SARS-CoV-2-specific effector T cells  
290 were abundant in the pulmonary compartment, but undetectable in nasal turbinates,  
291 tonsils, and salivary glands, highlighting major differences in localization of antigen-  
292 specific T cells into pulmonary and extrapulmonary mucosal tissues during SARS-CoV-2  
293 infection.

294 Type I IFN is emerging as a critical mediator of control of SARS-CoV-2 infection<sup>5-7</sup>. In  
295 our study the abundance of type I IFN activated myeloid cells in the BAL positively  
296 correlated with viral loads in the nasal swabs and BAL. These results are consistent with  
297 data from African green monkeys by Speranza et al. showing a strong type I IFN gene  
298 signature in macrophages from lung tissue three days after SARS-CoV-2 infection<sup>50</sup>.  
299 However, several scRNAseq studies from patients with COVID-19 have found that  
300 inflammatory monocytes/macrophage populations are increased with disease  
301 severity<sup>2,11,12,14</sup>, suggesting that early type I IFN responses are host protective but  
302 prolonged activation of this pathway may be detrimental.



303 Ag-specific T cell responses were substantially greater in the BAL versus PBMCs,  
304 with the average sum of spike, nucleocapsid, and membrane-specific T cells reaching  
305 ~12% of CD4 T cells and ~7% of CD8 T cells in the BAL compared to ~1% and ~0.2% in  
306 PBMC, respectively. In the BAL, virus-specific Th1 cell responses preceded CTL  
307 responses. Indeed, the CD8 T cell clonal burst likely had not yet peaked, evidenced by  
308 their maintained expression of Ki67 at day 10 post-infection. The lack of virus-specific T  
309 cells in the nasal turbinates, salivary glands, and tonsils, despite virus infection and  
310 subsequent clearance from these tissues, was surprising. The mechanisms underlying  
311 the lack of antigen-specific effector T cells in the infected nasal and oral mucosa are not  
312 clear. It remains possible that SARS-CoV-2-specific T cell responses were not detected  
313 in these sites because they produce molecules other than IFN $\gamma$ , TNF, IL-2, granzyme B,  
314 or degranulation markers CD107a/b, after *ex vivo* peptide stimulation. Nevertheless, it is  
315 unlikely that T cells in the nasal turbinates, salivary glands, and tonsils have a completely  
316 different functional profile compared to their counterparts in the rest of the host.  
317 Alternative techniques for functionally agnostic detection of SARS-CoV-2-specific T cell  
318 responses, such as the activation induced marker (AIM) assay, should be tested in future  
319 studies<sup>17,70,76</sup>. There may also be T cells in these tissues specific to antigens other than  
320 the ones tested here, although this too seems unlikely, as the peptide pools used contain  
321 numerous immunogenic peptides from across the entire viral genome<sup>69</sup>. Lastly, it is  
322 possible that T cells accumulate in these tissues after day 10, and further studies will be  
323 needed to determine the longevity and breadth of SARS-CoV-2 specific T cell responses  
324 in tissues at later time points.

325 Our findings support the hypothesis that control of primary SARS-CoV-2 infection in  
326 these tissues is T cell independent, which is consistent with a report by Hasenkrug et al.  
327 showing that rhesus macaques depleted of CD4 and/or CD8 T cells prior to SARS-CoV-  
328 2 infection controlled the virus in the upper and lower respiratory tract, albeit perhaps with  
329 a slight delay<sup>65</sup>. Another study also found that CD8 depletion in cynomolgus macaques  
330 had no impact on control of SARS-CoV-2 infection<sup>77</sup>. It is important to point out, however,  
331 that our data do not rule out a critical role for T cells in other settings of SARS-CoV-2  
332 infection. For example, T cells likely play a significant role when SARS-CoV-2 infection  
333 does not resolve quickly, such as during moderate and severe COVID-19. T cells have  
334 been implicated in control of SARS-CoV-2 in other susceptible animal models, like the  
335 human ACE2 expressing mouse lines and Syrian hamsters<sup>78-80</sup>. Furthermore,  
336 nucleocapsid specific CD8 T cells are correlated with less severe disease in patients<sup>20</sup>.  
337 In addition, preclinical studies suggest that depletion of CD8 T cells from vaccinated  
338 monkeys prior to SARS-CoV-2 challenge significantly impairs control of virus  
339 replication<sup>60</sup>. T cells may also play a major role in vaccine-elicited protection, and T cell  
340 targeted peptide vaccines are currently being developed<sup>20,81,82</sup>. Vaccine-elicited T cells  
341 may prove critical in protection against SARS-CoV-2 variants of concern that are able to  
342 evade neutralizing antibodies, as T cell epitopes are thought to be more conserved across  
343 isolates<sup>83</sup>. In our study, it should also be noted that T cells may have played a role in  
344 clearance of virus-infected cells remaining in the lungs after the first week, when T cells  
345 arrived in the tissue.

346        Altogether, these data show that mild SARS-CoV-2 infection is associated with  
347        effective innate immune-mediated control. Future studies are needed to determine the  
348        importance of individual innate and adaptive immune cell types in suppression of SARS-  
349        CoV-2 replication.

## 350 **MATERIALS AND METHODS**

### 351 *Study design*

352 All animal experiments were approved by Animal Care and Use Committee (ACUC) and all  
353 methods were approved on animal safety protocol LPD-25E at the National Institute of Health.  
354 Experiments were conducted in an AAALAC accredited aBSL-3 vivarium facility in Bethesda,  
355 Maryland. Animals were singly housed in vented air cages with a 12-hour light/dark cycle. The  
356 animals were monitored twice daily, with a detailed physical exam once per day during the study.  
357 The Institutional Biosafety Committee approved all work with SARS-CoV-2 in the BSL-3 level  
358 facility and approved any inactivation methods used.

359

### 360 *Animals and infection*

361 Six, male rhesus macaques aged 2.5 to 6 years, weighing 3-10 kg were infected with SARS-CoV-  
362 2/USA/WA-1 (Table 1). For infection, animals were anesthetized as described below and  
363 administered  $2 \times 10^6$  TCID<sub>50</sub> total:  $1 \times 10^6$  TCID<sub>50</sub> in 3mL intratracheally with a plastic gavage tube  
364 attached to 5 mL syringe, and  $5 \times 10^5$  TCID<sub>50</sub> in 0.5mL intranasally in each nostril. The animals  
365 were examined daily with a health scoring sheet, as previously described<sup>44</sup>. Animals were  
366 anesthetized with ketamine and dexmedetomidine at baseline (day -5 to -30), day 0, 1, 2, 3, 4, 7,  
367 and 10 (necropsy) for exams, viral load swabs, blood and BAL fluid draws, and complete blood  
368 count and C-reactive protein analysis. During anesthesia, animals were weighed and monitored  
369 for heart rate, respiratory rate, body temperature, oxygen saturation. Glycopyrrolate and  
370 atipamezole were given for recovery from anesthesia.

371

### 372 *<sup>18</sup>FDG-PET/CT Acquisition and Data Analysis*

373 Rhesus were sedated and imaged by PET/CT during mechanical ventilation (Hallowell Ventilator  
374 Model 2002) at baseline (day -22 to -5), on day 3, and 9 post infection. To reveal metabolic

375 hyperactivity consistent with inflammation, a [<sup>18</sup>F]-FDG dose of 0.5 mCi/kg was given  
376 intravenously 1 hour prior to PET imaging. During the uptake time a high-resolution CT scan of  
377 the lungs was acquired with a breath hold on a LFER 150 PET/CT scanner (Mediso Inc, Budapest,  
378 Hungary) as previously described<sup>84</sup>. The raw CT and PET data were reconstructed using the  
379 Nucline software (Mediso, Inc, Budapest, Hungary) to create individual DICOM files that were co-  
380 registered using MIM Maestro (v. 7.0, MIM Software Inc, Cleveland, Ohio).

381 By aligning baseline PET/CT fused images and those taken at day 3 and 9 in MIM  
382 Maestro, specific lung regions with abnormal density (> ~ -550 HU) or metabolic activity (> ~ 1.5  
383 SUV) were identified as volumes of interest (VOI) or lesions similar to methods used previously,  
384 rather than using whole lung volume of interest<sup>85</sup>. For each animal, the lesion VOIs (day 3 in this  
385 study) were transferred to the aligned PET/CT images acquired at baseline and the day 9 time  
386 point, adjusting for position variations but keeping the same volume. Disease volume was  
387 estimated by using two density thresholds: tissues harder than -550 Hounsfield Units (HU) or  
388 harder than -300 HU for evaluating change over time. Regarding metabolic activity, PET  
389 parameters were estimated using a threshold of > 2 standardized uptake value (SUV). Similar  
390 reference VOIs were used to identify metabolically activated tissues (SUV > 2) within peri-carinal  
391 lymph nodes (LN). LN [<sup>18</sup>F]-FDG uptake was measured in activated regions of the hilar and  
392 subcarinal LNs of each animal. Our analysis also included calculations of total lesion glycolysis  
393 (TLG). Two readers independently performed image analysis for each animal using consistent  
394 lesion labeling determined by a third reviewer. Three-dimensional projections of FDG uptake in  
395 the lung regions were generated using Osirix v 5.9 software (Pixmeo, Geneva, Switzerland) as  
396 previously described<sup>86</sup>.

397

398 *Blood and BAL collection*

399 Blood and BAL collection procedures followed ACUC approved standard operating procedures  
400 and limits. Blood was collected in EDTA tubes and centrifuged at 2,000rpm for 10 minutes at 22°C  
401 to isolate plasma. After plasma removal, remaining blood was diluted 1:1 with 1x PBS. 15mL of  
402 90% Ficoll-Paque density gradient (Cytiva Cat#17144002), diluted with 10x PBS, was added to  
403 SepMate™ PBMC Isolation Tubes (StemCell Cat#85450) and centrifuged at 1,000g for 1 minute  
404 at 22°C, to collect Ficoll below the separation filter. Blood and PBS mix was added to the SepMate  
405 tube with Ficoll-Paque and centrifuged at 1,200g for 10 minutes at 22°C. The upper layer was  
406 poured into a 50mL conical and brought to 50mL with PBS +1% FBS, and then centrifuged at  
407 1,600rpm for 5 minutes at 4°C. The cell pellet was resuspended at  $2 \times 10^7$  cell/mL in X-VIVO 15  
408 media + 10% FBS for subsequent analysis. BAL was collected after intubation by instillation of  
409 50mL of warm pharmaceutical-grade PBS, 10mLs at a time. For cellular analysis, BAL was filtered  
410 through a 100um filter into a 50mL conical and centrifuged at 1,600 rpm for 15 minutes at 4°C.  
411 The cell pellet was resuspended at  $2 \times 10^7$  cell/mL in X-VIVO 15 media + 10% FBS for subsequent  
412 analysis.

413

#### 414 *Necropsy*

415 Intravenous antibody was administered prior to euthanasia, as previously described<sup>74</sup>. Briefly,  
416 prior to necropsy, 10mL of blood was drawn as a negative control and 100ug/kg of αCD45-biotin  
417 (clone: ITS\_rhCD45 developed by Roederer Lab) was infused. After infusion the BAL and ~60mL  
418 of blood was collected. After prosection of the lung and airways, specific lung regions observed  
419 to have abnormal HU density or FDG uptake in the day 3 images were collected separately from  
420 the remainder of the lung. LNs identified as having regions of SUV > 2.5 were collected separately  
421 from those with lower SUV on day 3.

422

#### 423 *Viral RNA quantification*

424 RNA from the nose and throat was collected by swabbing each nostril or back of the throat,  
425 respectively, with a sterile swab for 10 seconds. Swabs were placed in 1mL viral transport media  
426 (1x HBSS, 2% FBS, 100ug/mL Gentamicin, and 0.5ug/mL amphotericin B) and stored on ice until  
427 RNA extraction. Swabs were vortexed in swab media before removing the swab tip. For RNA  
428 extraction 140uL of sample (plasma, 1<sup>st</sup> BAL wash, or swab media) was processed using a Viral  
429 RNA mini kit (Qiagen Cat# 52906) and eluted in 50uL RNase Free water. For RNA isolation from  
430 tissues, tissue pieces were weighed before placing in 1mL RNeasy Plus Mini kit (Qiagen Cat# R0901)  
431 and stored at 4°C overnight and then stored at -80°C long term. Tissues were then thawed and  
432 processed in the RNeasy Plus Mini kit (Qiagen # 74136) and eluted in 50uL RNase Free water.  
433 Eluted RNA was stored at -80°C long-term.

434         Extracted RNA was used in a RT-qPCR reaction for detection of total or subgenomic RNA  
435 from the N gene of SARS-CoV-2. Total RNA reactions amplify both genomic viral RNA and  
436 subgenomic viral mRNAs, and are labeled as genomic throughout the manuscript to differentiate  
437 from the subgenomic viral mRNA-specific amplifications. Each sample was prepared in a 12.5uL  
438 reaction, with 2.5uL of eluted RNA, 3.25uL Taqpath 1-step RT-qPCR Master Mix (Thermo  
439 Cat#A15299), primers at 500nM, probes at 125-200nM, and the remaining volume as RNase free  
440 water. N1 genomic RNA was detected with 2019-nCoV RUO Kit, 500 rxn (IDT #10006713),  
441 containing CDC 2019-nCoV\_N1 Forward Primer (5'-GAC CCC AAA ATC AGC GAA AT-3'), CDC  
442 2019-nCoV\_N1 Reverse Primer (5'-TCT GGT TAC TGC CAG TTG AAT CTG-3'), and CDC 2019-  
443 nCoV\_N1 Probe (5'-[FAM]-ACC CCG CAT TAC GTT TGG TGG ACC-[BHQ1]-3') at 125nM. N  
444 gene subgenomic RNA was detected using Forward Leader sequence primer (5'-CGA TCT CTT  
445 GTA GAT CTG TTC TC-3'), sgN Reverse (5'-GGT GAA CCA AGA CGC AGT AT-3'), and sgN  
446 Probe (5'-[FAM]-TAA CCA GAA TGG AGA ACG CAG TGG G-[BHQ1]-3',) at 200nM, all custom  
447 made from Eurofins. All samples were tested for RNA integrity using the 2019-nCoV RUO Kit for  
448 RNase P, containing CDC RNase P Forward Primer (5'-AGA TTT GGA CCT GCG AGC G-3'),

449 CDC RNase P Reverse Primer (5'-GAG CGG CTG TCT CCA CAA GT-3'), and CDC RNase P  
450 Probe (5'-[FAM]-TTC TGA CCT GAA GGC TCT GCG CG-[BHQ]-1-3'). Prepared reactions were  
451 read on a QuantStudio 7 Flex Real-Time PCR System, 384-well format (Applied Biosystems Cat#  
452 4485701). Cycling conditions: Initial: 25°C for 2 minutes, 50°C for 15 minutes, and 95°C for 2  
453 minutes, Cycling: 95°C for 3 seconds, 60°C for 30 seconds, for 40 cycles. Copies per/mL or  
454 copies/gram were calculated based on standard curves generated for each RT-qPCR run, with  
455 RNA standard of known quantity and 10, 5-fold dilutions, run in duplicate. The limit of detection  
456 was based on the CT limit of detection from the standard curve in each run. For genomic RNA,  
457 this was also limited to CT<35, based on manufacturer's instructions. For subgenomic RNA cutoff  
458 CT<37 was used.

459

#### 460 *Tissue digestion*

461 Tissues were processed for single cell suspension before flow cytometry or peptide stimulation  
462 as follows. Spleen (approximately 0.5 inch x 0.5 inch portion) and lymph nodes were placed in  
463 5mL of PBS + 1% FBS in a gentleMACS C tube (Miltenyi Cat#130096334) and run on  
464 gentleMACS Octo Dissociator (Miltenyi), with m\_spleen\_02\_01 setting, then filtered through a  
465 100um filter into a 50mL conical and centrifuged at 1,600rpm for 5 minutes at 4°C. Salivary gland  
466 was gentleMACS dissociated as above, and after centrifugation cells were resuspended in 7mL  
467 44% Percoll® (Sigma Cat# P1644) with 1xPBS and centrifuged at 2,000rpm for 20 minutes at  
468 22°C without brake. The tonsil and lung were gentleMACS dissociated in 5mL digestion buffer  
469 (RPMI + 50U/mL DNase I + 1mg/mL hyaluronidase + 1mg/mL collagenase D (Roche)) and then  
470 agitated on a shaker at 220rpm for 45 minutes at 37°C. Digestion reaction was stopped with equal  
471 parts PBS + 20% FBS and centrifuged at 1,600rpm for 5 minutes at 22°C. The cell pellet was  
472 resuspended in Percoll gradient, as above for salivary gland. After processing, the spleen and  
473 lung were cleared of red blood cells by resuspending cell pellet in 2mL of ACK Lysing Buffer



474 (Quality Biologicals Cat#118-156-101) for 2 minutes at room temperature, then stopping the  
475 reaction with 10-20mL of PBS + 1%FBS. Cells were resuspended at  $2 \times 10^7$  cell/mL in X-VIVO 15  
476 media + 10% FBS for further analysis.

477

#### 478 *Peptide stimulation assay*

479 Single cell suspensions were plated at  $2 \times 10^7$  cell/mL in 200uL in 96 well plates with X-VIVO 15  
480 media, plus 10% FBS, Brefeldin 1000x (Invitrogen Cat#00-4506-51) and Monensin 1000x  
481 (Invitrogen Cat#00-4505-51), CD107a APC 1:50, CD107b APC 1:50, and peptide pools at  
482 1ug/mL. Cells were stimulated for 6 hours at 37°C + 5% CO<sub>2</sub> before surface staining. Spike  
483 peptide pool consisted of Peptivator SARS-CoV-2 Prot\_S1 (Miltenyi Cat#130-127-048) and  
484 Peptivator SARS-CoV-2 Prot\_S (Miltenyi Cat#130-127-953). Nucleocapsid peptide pool  
485 consisted of Peptivator SARS-CoV-2 Prot\_N (Miltenyi Cat# 130-126-699). Membrane peptide  
486 pool consisted of Peptivator SARS-CoV-2 Prot\_M (Miltenyi Cat# 130-126-703). CD4 megapool  
487 consisted of CD4\_S\_MP and CD4\_R\_MP, and CD8 megapool consisted of CD8\_MP\_A and  
488 CD8\_MP\_B, as described<sup>70</sup>. After stimulation cells were centrifuged at 1,600 rpm for 5 minutes  
489 at 4°C and proceeded with surface staining.

490

#### 491 *Flow cytometry and antibody staining*

492 Cells were resuspended in 50uL surface stain antibodies diluted in PBS + 1% FBS and incubated  
493 for 20 minutes at 4°C. Cells were washed 3 times with PBS + 1% FBS, before fixation with  
494 eBioscience Intracellular Fixation & Permeabilization Buffer Set (Thermo Cat# 88-8824-00) for 16  
495 hours at 4°C. After fixation cells were centrifuged at 2,200rpm for 5 minutes at 4°C without brake  
496 and washed once with eBioscience Permeabilization Buffer. Cells were resuspended in 50uL  
497 intracellular stains diluted in eBioscience Permeabilization Buffer, and stained for 30 minutes at

498 4°C. After staining cells were washed with eBioscience Permeabilization Buffer 2x and  
499 resuspended in PBS + 1% FBS + 0.05% Sodium Azide for running on the BD Symphony platform.  
500 B cells were resuspended in 50uL Human Fc-Block (BD Cat#564220) diluted to 1:500 in PBS +  
501 1%FBS and incubated for 30 minutes at 4°C prior to washing and surface staining.

502

503 *Reagents:*

| antibody                | clone      | manufacturer     |
|-------------------------|------------|------------------|
| CD69                    | FN50       | Biologend        |
| Granzyme B              | GB11       | BD               |
| CD8a                    | RPA-T8     | Biologend        |
| IL-2                    | MQ1-17H12  | Biologend        |
| IFNg                    | 4S.B3      | Biologend        |
| IL-17A                  | FN50       | Biologend        |
| TNFa                    | Mab11      | BD               |
| CD4                     | SK3        | BD               |
| CD95                    | DX2        | BD               |
| CD3                     | SP34-2     | BD               |
| CD107a                  | H4A3       | Biologend        |
| CD107b                  | H4B4       | Biologend        |
| ViabilityDye eFluoro780 |            | Thermo           |
| CD103                   | B-Ly7      | ebioscience      |
| CD28                    | CD28.2     | Biologend        |
| Ki67                    | JES3-9D7   | BD               |
| IgD                     | AB_2795624 | Southern Biotech |
| BCL-6                   | K112-91    | BD               |
| IgM                     | G20-127    | BD               |
| HLA-DR                  | L243       | Biologend        |
| CD95                    | Dx2        | Biologend        |
| CD20                    | 2H7        | Biologend        |
| CXCR3                   | 1C6/CXCR3  | BD               |
| CCR6                    | 11A9       | BD               |
| CD27                    | L128       | BD               |
| IgA                     | A9604D2    | Southern Biotech |
| Streptavidin            |            | BD               |
| IgG                     | G18-145    | BD               |
| CD38                    | OKT10      | CapricoBio       |

504  
505  
506  
507  
508  
509  
510  
511  
512  
513  
514  
515  
516  
517  
518  
519  
520  
521  
522  
523  
524  
525  
526  
527

Ki-67

B56

BD

*Immunohistochemistry and RNA scope*

Tissue for histology were collected in 10% neutral buffered formalin and stored at room temperature for 16 hours. Fixed tissues were transferred to 70% ethanol and stored at room temperature until processing. Slides were cut 10-microns thick using standard RNase precautions. Immunohistochemical slides were deparaffinized and treated with AR6 Buffer (Akoya Biosciences, USA) for 20 minutes at 100°C. Tissues were then permeabilized using 0.2% TritonX 100 (Millipore Sigma, USA) for 10 minutes. After blocking, slides were incubated with primary antibodies against CD62P (clone EPR22850-190, Abcam, USA) and fibrin (clone 59D8, Millipore Sigma, USA) at a 1:500 and 1:200 concentration, respectively. Following washing, slides were stained according to the protocol for ImmPRESS Duet Double Staining Polymer Kit (Vector Laboratories, USA) and counter-stained with hematoxylin. Slides used for *in situ* hybridization were deparaffinized and treated with RNAscope epitope retrieval buffer (ACD Biotechne, USA) for 20 minutes at 100°C. Endogenous peroxidases were then blocked with hydrogen peroxide and tissue permeabilized with a diluted RNAscope protease plus for 20 minutes at 40°C. Probes for SARS-CoV-2, containing 20 pairs of probes spanning S gene (Category # 848561, ACD Biotechne, USA), were incubated for 2 hours at 40°C. Slides were then processed according to RNAscope 2.5 HD Assay-RED (ACD Biotechne, USA) protocol and counterstained with hematoxylin. Slides stained immunohistochemically or by *in situ* hybridization were imaged using Aperio VERSA (Leica Microsystems, USA) and analyzed using quPath, an open-source software developed by the University of Edinburgh. SARS-CoV-2 puncta were confirmed using both positive and negative controls to ensure accurate staining.

*Single cell RNA sequencing and data analyses*

528 Cells from the BAL fluid and PBMCs from blood were obtained as described above and  
529 cryopreserved in 1ml of RPMI + 40% FBS + 15% DMSO. PBMC and BAL samples from days -7,  
530 4, 7, 10 for monkeys DHGF, DG3V and DHKM and both sample types from days -7, 4 and 10 for  
531 monkey DG CX were processed for scRNAseq using the 10X Genomics Chromium Single Cell 3'  
532 kit (v3.1). Briefly, cryopreserved samples were quickly thawed using a water bath set to 37°C and  
533 washed twice using 10% FBS in RPMI. Samples were then stained with unique TotalSeq-A  
534 hashtag antibodies (HTO) as per manufacturer's (Biolegend) protocol. Equal number of cells from  
535 each sample were pooled and super-loaded on a 10X Genomics Next GEM chip and single cell  
536 GEMs were generated on a 10X Chromium Controller as previously described<sup>87</sup>. Subsequent  
537 steps to generate cDNA and HTO libraries were performed following 10X Genomics and  
538 Biolegend's protocol respectively. Libraries were pooled and sequenced on an Illumina NovaSeq  
539 S1 and S2 flow cells as per 10X sequencing recommendations.

540 The sequenced data was processed using cellranger (version 5.0) to demultiplex the  
541 libraries. The reads were aligned to *Macaca mulatta* mmul\_10 genome to generate count tables.  
542 The count tables were then further processed and analyzed using the Seurat (version 4.0) in R  
543 (version 4.1.0). Samples from different PBMC and BAL libraries were integrated using  
544 IntegrateData function to account for possible batch effects and to generate one integrated  
545 dataset for each tissue type. Cells were then filtered for less than 15% mitochondrial  
546 contamination and only singlets as determined by the HTOs were included resulting in 16,769  
547 PMBC and 7,274 BAL cells for downstream analysis. Data were normalized and scaled and  
548 FindVariableFeatures function was used to identify variable genes to subset and integrate the  
549 data to correct for animal bias. Principal component analysis was performed to find neighbors and  
550 clusters and UMAP reduction was performed with 20 dimensions. FindAllMarkers with a filter of  
551 log fold change  $\geq 0.25$  and percent of cells expressing the marker  $\geq 0.25$  was used to identify  
552 gene markers that distinguish the cell clusters, and the clusters were manually assigned cell types

553 based on identified canonical markers. Myeloid and T (and NK in case of PBMC) cell clusters  
554 were further subclustered and clusters were again manually annotated based on gene markers  
555 determined by the FindAllMarkers function. Differentially expressed genes between timepoints of  
556 a particular cluster were identified by running FindMarkers function with MAST and comparing  
557 one timepoint to all other timepoints or one timepoint to another in a pairwise manner. Genes with  
558 a log fold change  $\geq 0.5$ , percent of cells expressing the marker  $\geq 0.25$  and adjusted p value  $\leq 0.01$   
559 were considered significant and these genes were hierarchically clustered and displayed as a  
560 heatmap using the ComplexHeatmap function in R. Gene ontology enrichment analysis of genes  
561 upregulated at a particular timepoint was performed using clusterProfiler to identify biological  
562 processes (adjusted p value  $\leq 0.05$ ). The AverageExpression function was used to calculate  
563 average gene expression of IFN and IFN stimulated genes across all cells over time and was  
564 visualized using pheatmap.

565 Spearman's correlation test was performed between viral loads from various sites and  
566 fraction of cells in a particular cluster at all available timepoints and filtered for adjusted p value <  
567 0.05. Correlations were visualized using a network diagram generated using igraph in R.

568

569 *Total-SeqA hashtag antibodies:*

| antibody        | clone       | manufacturer |
|-----------------|-------------|--------------|
| TotalSeq™-A0251 | LNH-94; 2M2 | Biolegend    |
| TotalSeq™-A0252 | LNH-94; 2M2 | Biolegend    |
| TotalSeq™-A0253 | LNH-94; 2M2 | Biolegend    |
| TotalSeq™-A0254 | LNH-94; 2M2 | Biolegend    |
| TotalSeq™-A0255 | LNH-94; 2M2 | Biolegend    |
| TotalSeq™-A0256 | LNH-94; 2M2 | Biolegend    |

|                 |             |           |
|-----------------|-------------|-----------|
| TotalSeq™-A0257 | LNH-94; 2M2 | Biolegend |
| TotalSeq™-A0258 | LNH-94; 2M2 | Biolegend |
| TotalSeq™-A0259 | LNH-94; 2M2 | Biolegend |
| TotalSeq™-A0260 | LNH-94; 2M2 | Biolegend |
| TotalSeq™-A0262 | LNH-94; 2M2 | Biolegend |
| TotalSeq™-A0263 | LNH-94; 2M2 | Biolegend |
| TotalSeq™-A0264 | LNH-94; 2M2 | Biolegend |
| TotalSeq™-A0265 | LNH-94; 2M2 | Biolegend |

570

571 *Data availability*

572 Single-cell RNAseq read data will be submitted to NCBI.

573

## 574 **ACKNOWLEDGEMENTS**

575 We would like to acknowledge the Center for Cancer Research Sequencing Facility at the  
576 Frederick National Laboratory for Cancer Research for performing the sequencing and  
577 Drs. Paul Schaugency and Justin Lack of the NIAID Collaborative Bioinformatics  
578 Resource for assistance with the bioinformatics. We would like to thank Dr. Rashida  
579 Moore for clinical care of the macaques and Drs. Kerry Hilligan and Paul Baker for  
580 assistance with S.O.P.s and inactivation method development for SARS-CoV-2 BSL-3  
581 work. Funding for this study was provided in part by the Division of Intramural  
582 Research/NIAID/NIH. A.S. and D.W. were supported by NIH grant contract no.  
583 75N9301900065. The content of this publication does not necessarily reflect the views or  
584 policies of DHHS, nor does the mention of trade names, commercial products, or  
585 organizations imply endorsement by the U.S. Government.

586

587 **AUTHOR CONTRIBUTIONS**

588 C.E.N. led the study. C.E.N., J.M.B., L.E.V., and D.L.B. designed the study. C.E.N., S.N.,  
589 T.W.F., K.D.K., S.S., D.D., and N.E.L. performed experiments. C.E.N., T.W.F., and D.L.B.  
590 analyzed data. S.N., A.S., C.E.N., and D.L.B. performed single cell RNA sequencing  
591 analysis. The Tuberculosis Imaging Program (TBIP) managed logistics and performed  
592 NHP manipulations including infection, necropsy, PET/CT scanning, and imaging  
593 analysis. F.G. and J.D.F. analyzed the PET/CT data. L.E.V. supervised T.B.I.P. and  
594 designed the analysis for PET/CT data. C.E.N., S.N., T.W.F, and D.L.B. made figures.  
595 E.L.P., M.R., D.W., E.dW., and H.D.H. provided necessary reagents for the completion  
596 of the study. C.E.N., S.N. and D.L.B. wrote the manuscript. All authors contributed to  
597 editing the manuscript. D.L.B. supervised the study.

598

599 **CONFLICT OF INTERESTS:**

600 A.S. is a consultant for Gritstone, Flow Pharma, Arcturus, Immunoscope, CellCarta,  
601 OxfordImmunotech and Avalia. LJI has filed for patent protection for various aspects of T  
602 cell epitope and vaccine design work. All other authors declare no conflict of interest.

603 **TABLES**

604 **Table 1: Study animal information.**

| animal ID | sex  | Age<br>(years) | weight<br>(kg) | experimental<br>round |
|-----------|------|----------------|----------------|-----------------------|
| DGCX      | Male | 5.58           | 7.86           | 1                     |
| DG3V      | Male | 4.58           | 6.81           | 1                     |
| DHGF      | Male | 2.58           | 3.7            | 2                     |
| DHKM      | Male | 2.92           | 3.96           | 2                     |
| DGRX      | Male | 4.83           | 9.68           | 3                     |
| DG4i      | Male | 4.83           | 10.01          | 3                     |

605



606 **FIGURE LEGENDS**

607

608 **Figure 1: Mild disease and rapid viral clearance in rhesus macaques infected with**

609 **SARS-CoV-2.** Six rhesus macaques infected with  $2 \times 10^6$  TCID<sub>50</sub> of SARS-CoV-2/WA-1

610 intranasally ( $1 \times 10^6$ ) and intratracheally ( $1 \times 10^6$ ). (A) 3D rendering of lung <sup>18</sup>FDG-PET/CT

611 images pre-infection, day 3 and 9 post-infection. (B) Quantification of the metabolic

612 activity (mean <sup>18</sup>FDG SUV) and volume of tissue with >-300 Hounsfield units (HU) (size

613 of dot) from individual lesions, based on VOI defined at day 3 post infection. (C)

614 Quantification of density (mean HU) and volume of tissue with > -300 HU (size of dot)

615 from individual lesions, based on VOI defined day 3 post infection. DG CX did not have

616 any detectable lung lesions. DGRX and DG4i did not have PET/CT imaging done at day

617 9 post infection. (D) Quantification of viral genomic RNA (left column) and subgenomic

618 RNA (right column) of the N gene from nasal swabs, throat swabs, BAL, and plasma in

619 copies/mL by RT-qPCR. Cutoff for positivity for genomic RNA is 3000 copies/mL, cutoff

620 for subgenomic RNA is 2500 copies/mL (nasal/throat) or 3000 copies/mL (BAL/plasma).

621 (E-F) Quantification of viral genomic RNA (E) and subgenomic RNA (F) of the N gene

622 from tissues at day 10 post infection in copies/gram of tissue by RT-qPCR with individual

623 samples and median. Numbers above graph indicate number of samples with positive

624 values (numerator) over total number of samples tested (denominator). Cutoff for

625 genomic RNA is CT>35 and 1000 copies/gram tissues, cutoff for subgenomic RNA is CT

626 >37 and 1000 copies/gram tissue. (G) Representative images of staining for SARS-CoV-

627 2 genomic RNA by RNA scope from the lung and nasopharynx at day 10 post infection.

628 Red is viral RNA. (H) Representative images of clotting patterns in the lung at day 10 post  
629 infection. Red is platelet staining for CD62P, brown is fibrin, and blue are nuclei.

630

631 **Figure 2: Rapid and transient alterations in CD14<sup>+</sup> monocytes in PBMCs after**

632 **SARS-CoV-2 infection.** (A) UMAP plot representing the clustering pattern of cells from

633 scRNA-seq data of PBMCs from 4 animals (DGCX, DG3V, DHGF, and DHKM) (left

634 panel). Each dot denotes a cell and is colored based on automated cluster identification.

635 Clusters of cells belonging to a certain cell-type are demarcated and indicated on the plot.

636 Expression levels of cell type defining markers are shown as a dot plot (right panel). Color

637 intensity and dot size represent level of expression and percent of cells in that cluster

638 expressing the gene as defined in the key. (B) UMAP representation of the sub-clustering

639 of the myeloid cells from A. Clusters were annotated with cell-types based on gene

640 expression patterns as shown on the dot plot and are identified with different numbers

641 and colors on the plots. (C) UMAP plots separated by time depict the kinetic of the myeloid

642 cells characterized in B at pre-infection (d-7), and day 4, 7, and 10 post-infection. (D)

643 Fraction of cells that comprise each myeloid cell-type for each of the 4 timepoints shown

644 in C is summarized. (E-G). Heatmap represents the hierarchical clustering of normalized

645 expression levels of differentially expressed genes for each cell for three myeloid clusters.

646 The cluster names are indicated on top of the heatmap and the first and second color

647 bars distinguish time point and animal respectively. Genes were considered differentially

648 expressed between timepoints if log fold change  $\geq 0.5$  and adjusted p-value  $< 0.01$ .

649 Biological processes associated with the genes are indicated on the side and the blue  
650 box highlights type I IFN responsive genes upregulated at day 4.

651

652 **Figure 3: Myeloid cell activation in the airways after SARS-CoV-2 infection.** (A)

653 UMAP plot of scRNAseq data from BAL of 4 rhesus macaques (DGCX, DG3V, DHGF,

654 and DHKM) (top panel). Cell clusters are annotated based on broad cell-types and are

655 circled and indicated on the plot. Each dot represents a cell and is colored by cluster. Dot

656 plot displays expression level of markers used to identify the cell types (lower panel).

657 Color intensity and dot size represent level of expression and percent of cells in that

658 cluster expressing the gene marker as defined in the key. (B) UMAP plot (left) of the sub-

659 clustering of the myeloid cells from A. Clusters were annotated with cell-types based on

660 gene expression patterns as shown on the dot plot and are identified with different

661 numbers and colors on the plots. (right). (C) UMAP plots depict the kinetic of myeloid cells

662 over time (left) and the fraction of cells that compromise each cluster at pre-infection (d-

663 7), and day 4, 7, and 10 post-infection is summarized as the bar plot (right). (D-E)

664 Normalized gene expression from cells of two BAL myeloid clusters is visualized as a

665 hierarchically clustered heatmap. The timepoints and animals are indicated as colored

666 bars above the heatmap and are defined in the color key. Only genes that were

667 differentially expressed between timepoints ( $\log$  fold change  $\geq 0.5$  and adjusted p-value

668  $< 0.01$ ) are shown. Biological processes associated with the genes are indicated on the

669 side and the blue box highlights type I IFN responsive genes upregulated at day 4. (F)

670 Spearman's correlation matrix based on the kinetics of viral loads and fraction of cells

671 from BAL and PBMC myeloid and lymphoid clusters was calculated and visualized as a  
672 correlation network. Each circle represents a parameter with the different colors indicating  
673 a viral, BAL or PBMC cluster parameter. The size of the circle is proportional to the  
674 number of significant correlations (adjusted  $p < 0.05$ ). A connecting line between two  
675 parameters indicates a significant correlation with green and pink lines signifying a  
676 positive and negative correlation respectively. (G) Average expression of IFN and IFN  
677 stimulated genes from all BAL cells separated by time is clustered and represented as a  
678 heatmap. Genes that show a significant difference (adjusted  $p < 0.05$ ) in expression over  
679 time are indicated with “\*”.

680

681 **Figure 4. Kinetics of SARS-COV-2-specific CD8 and CD4 T cell responses in the**  
682 **airways.** (A-D) Ag-specific CD8 and CD4 T cell responses in the blood and BAL  
683 enumerated by production of cytokines (IFN $\gamma$  and/or TNF) after *ex vivo* peptide stimulation  
684 with peptide pools to Spike (S), Nucleocapsid (N), Membrane (M), and an optimized  
685 SARS-CoV-2 peptide megapool. Representative flow cytometry plots of Ag-specific CD8  
686 and CD4 T cells from ID#DG4i at day 10 post infection from unstimulated, megapool, S,  
687 N, and M peptides from blood (A) and BAL (B), gated on activated T cells i.e., CD8<sup>+</sup>CD95<sup>+</sup>  
688 or CD4<sup>+</sup>CD95<sup>+</sup>. Quantification of Ag-specific T cells from all animals over time in blood  
689 (C) and BAL (D), calculated by subtracting the frequency of IFN $\gamma$ <sup>+</sup> and/or TNF<sup>+</sup> in the  
690 unstimulated samples from the frequency in the stimulated samples. Bottom row of  
691 graphs is an overlay of the mean CD8 and CD4 Ag-specific responses with standard error  
692 and a Dunnett’s multiple comparison test of CD4 vs. CD8 responses at each timepoint,

693 p-value <0.05 is considered significant. DGCX and DG3V do not have quantification from  
694 day 4 BAL of S, N, and M responses, and are only represented by megapool at day 4.  
695 (E) Representative flow cytometry plots of Ki67 expression by Ag-specific CD8 and CD4  
696 T cells from the BAL after S peptide stimulation at day 7 and day 10 post infection from  
697 ID#DG4i. Graphs indicate the percent Ki67<sup>+</sup> of Ag-specific CD8 and CD4 T cells  
698 responding to megapool, S, and N peptides from BAL at day 7 and day 10 post infection.  
699 Only samples with >35 data points were included. Paired t-test of day 7 vs. day 10 for  
700 CD8 and CD4 separately, and CD8 day 10 vs. CD4 day 10. Ki67 staining was not done  
701 for ID#DGCX and DG3V. (F) Representative flow cytometry plots of Granzyme B,  
702 CD107a/b, and IL-2 expression by Ag-specific CD8 and CD4 T cells from the BAL after  
703 S peptide stimulation at day 7 and day 10 post infection from ID#DG4i. Graphs indicate  
704 the percent Granzyme B<sup>+</sup>, CD107a/b<sup>+</sup>, or IL-2<sup>+</sup> of Ag-specific CD8 and CD4 T cells  
705 responding to megapool, S, and N peptides from BAL at day 7 and day 10 post infection.  
706 Only samples with >35 data points were included. Paired t-test of day 7 vs. day 10 for  
707 CD8 and CD4 separately.

708

709 **Figure 5. Distribution of SARS-CoV-2-specific effector CD8 and CD4 T cells in**  
710 **mucosal tissues.** (A-C) CD69 and CD103, and antigen-specific T cell responses after  
711 *ex vivo* peptide stimulation from secondary lymphoid organs and non-lymphoid tissues at  
712 day 10 post infection. (A) Representative flow cytometry plots of CD69 and CD103  
713 expression on CD8<sup>+</sup>CD95<sup>+</sup> or CD4<sup>+</sup>CD95<sup>+</sup>, from BAL, previously hot lung sections,  
714 normal lung sections, nasal turbinates, salivary gland (parotid), tonsil, previously hot

715 pulmonary lymph node, normal pulmonary lymph node, peripheral lymph node (axillary),  
716 spleen, and blood from ID#DHGF in unstimulated samples at day 10 post infection. (B)  
717 Enumeration of percent CD69<sup>+</sup> and CD103<sup>+</sup> of CD8<sup>+</sup>CD95<sup>+</sup> or CD4<sup>+</sup>CD95<sup>+</sup> in  
718 unstimulated samples. Peripheral lymph node includes axillary, inguinal, and cervical  
719 lymph nodes. Previously hot lung sections not done for DGCX and DG3V. Sidak's multiple  
720 comparison test for values on CD8 vs. CD4 T cells for each tissue. (C) Tissue distribution  
721 diagram and quantification of the frequency of Ag-specific (IFN $\gamma$ <sup>+</sup> and/or TNF<sup>+</sup>) in  
722 CD4<sup>+</sup>CD95<sup>+</sup> (left graph) or CD8<sup>+</sup>CD95<sup>+</sup> (right graph) in each tissue. Frequency calculated  
723 by subtracting the frequency of IFN $\gamma$ <sup>+</sup> and/or TNF<sup>+</sup> in the unstimulated samples from the  
724 frequency in the stimulated samples. Animals are indicated by shapes and stimulation  
725 peptide by color. Statistics are paired t-tests of stimulated vs. unstimulated for each  
726 condition. Raw values not plotted. Ag-specific T cells from BAL and blood at day 10, was  
727 shown in figure 4, with addition of CD8 megapool here. Tissue graphic created with  
728 BioRender.com (D) Representative summary graphs of the immune response to SARS-  
729 CoV-2 infection in rhesus macaques. Top graph: median genomic and subgenomic viral  
730 RNA levels from nasal swabs on a log scale, as in figure 1. Middle graph: mean frequency  
731 of myeloid subpopulation 1 and 6 in BAL, as in figure 3. Bottom graph: mean frequency  
732 of the sum of Ag-specific T cells (S+N+M peptide pools) in BAL, as in figure 4.

733

#### 734 **Supplementary Materials:**

735 **Supplemental Figure 1 (refers to Figure 1). Viral RNA levels are not correlated with**  
736 **disease severity.** Correlation analysis of viral RNA and lung lesion severity. (A)

737 Correlation of genomic RNA and subgenomic RNA in copies/mL in nasal swabs (left  
738 graph) and throat swabs (right graph) from day 1 to day 4, as shown in figure 1D. (B)  
739 Correlation of genomic RNA and subgenomic RNA in copies/mL in BAL from day 4 and  
740 day 7, as shown in figure 1D. (C) Correlation of genomic RNA and subgenomic RNA in  
741 copies/gram of tissue from day 10 in tissues with values >limit of detection, as shown in  
742 figure 1E. (D) Correlation of genomic RNA (left graph) or subgenomic RNA (right graph)  
743 at day 1 in nasal swabs and the sum of lung lesion metabolic activity at day 3. (E)  
744 Correlation of genomic RNA (left graph) or subgenomic RNA (right graph) at day 1 in the  
745 nasal swabs and the sum of lung lesion size at day 3. (F) Correlation of genomic RNA  
746 (left graph) or subgenomic RNA (right graph) at day 4 in the BAL and the sum of lung  
747 lesion metabolic activity at day 3. (G) Correlation of genomic RNA (left graph) or  
748 subgenomic RNA (right graph) at day 4 in the BAL and the sum of lung lesion size at day  
749 3.

750

751 **Supplemental Figure 2 (refers to Figure 2 and 3). Minor alterations in T cells and**  
752 **NK cells in PBMC and BAL as measured by scRNAseq.** (A,D) UMAP plot shows the  
753 sub-clustering of PBMC T and NK cells (A) from Figure 2A and BAL T cells (D) from  
754 Figure 3A (top panels). Clusters were annotated with cell-types based on gene  
755 expression patterns as shown on the dot plot and are identified with different numbers  
756 and colors on the plots. (lower panels). (B,E) UMAP plots depict the kinetic of lymphoid  
757 cells over time. (C,F) Fraction of cells present in each of the lymphoid cell clusters in  
758 PMBC (C) and BAL (F) is summarized.

759

760 **Supplemental Figure 3. B cell responses after SARS-CoV-2 infection in rhesus**

761 **macaques.** Quantification of different B cell subsets after SARS-CoV-2 infection.

762 Representative flow cytometry gating strategy of B cells and B cell subsets (i.e., resting

763 naïve, activated naïve, germinal center B cells (GC B cells), plasmablasts, activated

764 memory and different isotypes IgG<sup>+</sup>, IgM<sup>+</sup>, and IgA<sup>+</sup>) from the blood (A) and BAL (B) from

765 ID#DHGF at day 7. (C) Quantification of total B cells from the blood and BAL over time.

766 Dunnett's multiple comparison test comparing to day 0. (D) Quantification of different B

767 cell subsets in the blood and BAL as a frequency of total B cells. Showing the mean value

768 from all animals with standard error. Dunnett's multiple comparison test comparing values

769 to day 0. No BAL data on B cells was collected for DGCX and DG3V. (E) Quantification

770 of the frequency of IgG<sup>+</sup>, IgM<sup>+</sup>, IgA<sup>+</sup>, and isotype undefined of activated memory B cells.

771 Dunnett's multiple comparison test comparing values to day 0. DGCX and DG3V did not

772 have baseline values. (F-H) Frequency of total B cells (F), subsets (G), and isotypes (H)

773 from spleen, peripheral lymph nodes (axillary, inguinal, and/or cervical), previously hot

774 pulmonary lymph nodes, normal pulmonary lymph nodes, and lung sections at day 10

775 post infection. No data from the lungs of DGCX, DG3V, DGRX, and DG4i; previously hot

776 pulmonary lymph nodes from DGCX and DG3V; normal pulmonary lymph nodes from

777 DGRX; or peripheral lymph nodes from DGRX. Significance for G and H done using a

778 Turkey's multiple comparison test. In G, significant difference in lung activated memory

779 subset vs. spleen, peripheral LN, previously hot and normal pulmonary LN. Significant

780 difference in activated naïve in lung vs. previously hot pulmonary LN. Significant



781 difference in resting naïve in lung vs. spleen, peripheral LN, and previously hot pulmonary  
782 LN. In H, significant difference in IgG<sup>+</sup> and unknown isotype in peripheral LN vs. spleen.  
783 Significant difference in unknown isotype in normal pulmonary LN vs. spleen. IgA isotype  
784 not quantified at day 10 necropsy. (I-K) Anti-spike IgG and IgM antibody responses in the  
785 plasma and BAL at day 0 and day 10 post infection. (I) Anti-Spike IgG antibody titration  
786 curves at day 0 and day 10 post-infection compared to uninfected and convalescent NHP  
787 plasma. Area under the curve (AUC) of the antibody titration curves for anti-Spike IgG  
788 and IgM responses at day 0 and day 10 in the plasma (J) and BAL (K). Significance  
789 calculated with Sidak's multiple comparison test.

790

791 **Supplemental Figure 4 (refers to Figure 4 and 5). Activation of bulk and antigen-**  
792 **specific T cell responses in the blood and BAL.** (A) Bulk CD3<sup>+</sup>, CD4<sup>+</sup>CD95<sup>+</sup>, or  
793 CD8<sup>+</sup>CD95<sup>+</sup> responses overtime as a frequency of live cells in the blood and BAL.  
794 Significance indicated with Dunnett's multiple comparison test comparing individual  
795 timepoint to baseline. Bottom set of graphs overlay the mean CD4<sup>+</sup>CD95<sup>+</sup> and  
796 CD8<sup>+</sup>CD95<sup>+</sup> response with standard deviation. (B) Frequency of Ki67<sup>+</sup> on bulk CD3<sup>+</sup>,  
797 CD4<sup>+</sup>CD95<sup>+</sup>, or CD8<sup>+</sup>CD95<sup>+</sup> in the blood and BAL. Bottom set of graphs overlay the mean  
798 Ki67<sup>+</sup> on CD4<sup>+</sup>CD95<sup>+</sup> and CD8<sup>+</sup>CD95<sup>+</sup> response with standard deviation. Ki67 stain not  
799 done in DG CX or DG3V. (C) Representative flow cytometry plots from ID#DG4i and  
800 quantification of the frequency of CD69<sup>+</sup> on Ag-specific CD4 and CD8 T cells from the  
801 BAL on day 7 and day 10 post infection. Paired t-test comparing day 7 vs. day 10 for CD4  
802 and CD8 separately, and CD4 day 10 vs. CD8 day 10. (D) Representative flow cytometry

803 plots from ID#DG4i and quantification of the frequency of CD103<sup>+</sup> on Ag-specific CD4  
804 and CD8 T cells from the BAL on day 7 and day 10 post infection. Paired t-test comparing  
805 day 7 vs. day 10 for CD4 and CD8 separately, and CD4 day 10 vs. CD8 day 10

806

807 **Supplemental Figure 5 (refers to figure 5). Parenchymal localization of T cells in**  
808 **tissues from SARS-CoV-2 rhesus macaques.** (A) Representative flow cytometry plots  
809 of intravenous (i.v.) staining vs. CD69 on CD4<sup>+</sup>CD95<sup>+</sup> and CD8<sup>+</sup>CD95<sup>+</sup> from tissues at  
810 necropsy from ID#DGRX, except salivary gland, which was from ID#DGCX. (B)  
811 Quantification of parenchymal CD4<sup>+</sup>CD95<sup>+</sup> and CD8<sup>+</sup>CD95<sup>+</sup> T cells (equivalent to i.v.  
812 stain negative) from tissues at necropsy. DHGF and DHKM did not have i.v. stain.

## 813 REFERENCES

- 814 1 Mann, E. R. *et al.* Longitudinal immune profiling reveals key myeloid signatures  
815 associated with COVID-19. *Sci Immunol* **5**, doi:10.1126/sciimmunol.abd6197 (2020).
- 816 2 Stephenson, E. *et al.* Single-cell multi-omics analysis of the immune response in COVID-  
817 19. *Nat Med* **27**, 904-916, doi:10.1038/s41591-021-01329-2 (2021).
- 818 3 Chen, G. *et al.* Clinical and immunological features of severe and moderate coronavirus  
819 disease 2019. *J Clin Invest* **130**, 2620-2629, doi:10.1172/JCI137244 (2020).
- 820 4 Dhar, S. K., K, V., Damodar, S., Gujar, S. & Das, M. IL-6 and IL-10 as predictors of  
821 disease severity in COVID-19 patients: results from meta-analysis and regression.  
822 *Heliyon* **7**, e06155, doi:10.1016/j.heliyon.2021.e06155 (2021).
- 823 5 Zhang, Q. *et al.* Inborn errors of type I IFN immunity in patients with life-threatening  
824 COVID-19. *Science* **370**, doi:10.1126/science.abd4570 (2020).
- 825 6 Bastard, P. *et al.* Autoantibodies against type I IFNs in patients with life-threatening  
826 COVID-19. *Science* **370**, doi:10.1126/science.abd4585 (2020).
- 827 7 Hadjadj, J. *et al.* Impaired type I interferon activity and inflammatory responses in severe  
828 COVID-19 patients. *Science* **369**, 718-724, doi:10.1126/science.abc6027 (2020).
- 829 8 Rodrigues, T. S. *et al.* Inflammasomes are activated in response to SARS-CoV-2  
830 infection and are associated with COVID-19 severity in patients. *J Exp Med* **218**,  
831 doi:10.1084/jem.20201707 (2021).
- 832 9 Sinha, S. *et al.* Dexamethasone modulates immature neutrophils and interferon  
833 programming in severe COVID-19. *Nat Med*, doi:10.1038/s41591-021-01576-3 (2021).
- 834 10 Lagunas-Rangel, F. A. Neutrophil-to-lymphocyte ratio and lymphocyte-to-C-reactive  
835 protein ratio in patients with severe coronavirus disease 2019 (COVID-19): A meta-  
836 analysis. *J Med Virol* **92**, 1733-1734, doi:10.1002/jmv.25819 (2020).
- 837 11 Schulte-Schrepping, J. *et al.* Severe COVID-19 Is Marked by a Dysregulated Myeloid  
838 Cell Compartment. *Cell* **182**, 1419-1440 e1423, doi:10.1016/j.cell.2020.08.001 (2020).
- 839 12 Liao, M. *et al.* Single-cell landscape of bronchoalveolar immune cells in patients with  
840 COVID-19. *Nat Med* **26**, 842-844, doi:10.1038/s41591-020-0901-9 (2020).
- 841 13 Giamarellos-Bourboulis, E. J. *et al.* Complex Immune Dysregulation in COVID-19  
842 Patients with Severe Respiratory Failure. *Cell Host Microbe* **27**, 992-1000 e1003,  
843 doi:10.1016/j.chom.2020.04.009 (2020).
- 844 14 Szabo, P. A. *et al.* Longitudinal profiling of respiratory and systemic immune responses  
845 reveals myeloid cell-driven lung inflammation in severe COVID-19. *Immunity* **54**, 797-  
846 814 e796, doi:10.1016/j.immuni.2021.03.005 (2021).
- 847 15 Mathew, D. *et al.* Deep immune profiling of COVID-19 patients reveals distinct  
848 immunotypes with therapeutic implications. *Science* **369**, doi:10.1126/science.abc8511  
849 (2020).
- 850 16 Lucas, C. *et al.* Longitudinal analyses reveal immunological misfiring in severe COVID-  
851 19. *Nature* **584**, 463-469, doi:10.1038/s41586-020-2588-y (2020).
- 852 17 Rydzynski Moderbacher, C. *et al.* Antigen-Specific Adaptive Immunity to SARS-CoV-2  
853 in Acute COVID-19 and Associations with Age and Disease Severity. *Cell* **183**, 996-  
854 1012 e1019, doi:10.1016/j.cell.2020.09.038 (2020).
- 855 18 Neidleman, J. *et al.* Distinctive features of SARS-CoV-2-specific T cells predict recovery  
856 from severe COVID-19. *Cell Rep* **36**, 109414, doi:10.1016/j.celrep.2021.109414 (2021).

- 857 19 Mallajosyula, V. *et al.* CD8(+) T cells specific for conserved coronavirus epitopes  
858 correlate with milder disease in COVID-19 patients. *Sci Immunol* **6**,  
859 doi:10.1126/sciimmunol.abg5669 (2021).
- 860 20 Peng, Y. *et al.* An immunodominant NP105-113-B\*07:02 cytotoxic T cell response  
861 controls viral replication and is associated with less severe COVID-19 disease. *Nat*  
862 *Immunol*, doi:10.1038/s41590-021-01084-z (2021).
- 863 21 Khoury, D. S. *et al.* Neutralizing antibody levels are highly predictive of immune  
864 protection from symptomatic SARS-CoV-2 infection. *Nat Med* **27**, 1205-1211,  
865 doi:10.1038/s41591-021-01377-8 (2021).
- 866 22 Earle, K. A. *et al.* Evidence for antibody as a protective correlate for COVID-19  
867 vaccines. *Vaccine* **39**, 4423-4428, doi:10.1016/j.vaccine.2021.05.063 (2021).
- 868 23 Feng, S. *et al.* Correlates of protection against symptomatic and asymptomatic SARS-  
869 CoV-2 infection. *Nat Med*, doi:10.1038/s41591-021-01540-1 (2021).
- 870 24 Hall, V. J. *et al.* SARS-CoV-2 infection rates of antibody-positive compared with  
871 antibody-negative health-care workers in England: a large, multicentre, prospective  
872 cohort study (SIREN). *The Lancet* **397**, 1459-1469, doi:10.1016/s0140-6736(21)00675-9  
873 (2021).
- 874 25 Poon, M. M. L. *et al.* SARS-CoV-2 infection generates tissue-localized immunological  
875 memory in humans. *Sci Immunol*, eabl9105, doi:10.1126/sciimmunol.abl9105 (2021).
- 876 26 Grau-Exposito, J. *et al.* Peripheral and lung resident memory T cell responses against  
877 SARS-CoV-2. *Nat Commun* **12**, 3010, doi:10.1038/s41467-021-23333-3 (2021).
- 878 27 Matschke, J. *et al.* Neuropathology of patients with COVID-19 in Germany: a post-  
879 mortem case series. *The Lancet Neurology* **19**, 919-929, doi:10.1016/s1474-  
880 4422(20)30308-2 (2020).
- 881 28 Mukerji, S. S. & Solomon, I. H. What can we learn from brain autopsies in COVID-19?  
882 *Neurosci Lett* **742**, 135528, doi:10.1016/j.neulet.2020.135528 (2021).
- 883 29 Remmelink, M. *et al.* Unspecific post-mortem findings despite multiorgan viral spread in  
884 COVID-19 patients. *Crit Care* **24**, 495, doi:10.1186/s13054-020-03218-5 (2020).
- 885 30 Yao, X. H. *et al.* A cohort autopsy study defines COVID-19 systemic pathogenesis. *Cell*  
886 *Res* **31**, 836-846, doi:10.1038/s41422-021-00523-8 (2021).
- 887 31 Stein, S. *et al.* SARS-CoV-2 infection and persistence throughout the human body and  
888 brain. *Nature preprint*, doi:10.21203/rs.3.rs-1139035/v1 (2021).
- 889 32 Zheng, J. *et al.* COVID-19 treatments and pathogenesis including anosmia in K18-  
890 hACE2 mice. *Nature* **589**, 603-607, doi:10.1038/s41586-020-2943-z (2021).
- 891 33 Bao, L. *et al.* The pathogenicity of SARS-CoV-2 in hACE2 transgenic mice. *Nature* **583**,  
892 830-833, doi:10.1038/s41586-020-2312-y (2020).
- 893 34 Winkler, E. S. *et al.* SARS-CoV-2 infection of human ACE2-transgenic mice causes  
894 severe lung inflammation and impaired function. *Nat Immunol* **21**, 1327-1335,  
895 doi:10.1038/s41590-020-0778-2 (2020).
- 896 35 Sun, J. *et al.* Generation of a Broadly Useful Model for COVID-19 Pathogenesis,  
897 Vaccination, and Treatment. *Cell* **182**, 734-743 e735, doi:10.1016/j.cell.2020.06.010  
898 (2020).
- 899 36 Israelow, B. *et al.* Mouse model of SARS-CoV-2 reveals inflammatory role of type I  
900 interferon signaling. *J Exp Med* **217**, doi:10.1084/jem.20201241 (2020).

- 901 37 Imai, M. *et al.* Syrian hamsters as a small animal model for SARS-CoV-2 infection and  
902 countermeasure development. *Proc Natl Acad Sci U S A* **117**, 16587-16595,  
903 doi:10.1073/pnas.2009799117 (2020).
- 904 38 Sia, S. F. *et al.* Pathogenesis and transmission of SARS-CoV-2 in golden hamsters.  
905 *Nature* **583**, 834-838, doi:10.1038/s41586-020-2342-5 (2020).
- 906 39 Chan, J. F. *et al.* Simulation of the Clinical and Pathological Manifestations of  
907 Coronavirus Disease 2019 (COVID-19) in a Golden Syrian Hamster Model: Implications  
908 for Disease Pathogenesis and Transmissibility. *Clin Infect Dis* **71**, 2428-2446,  
909 doi:10.1093/cid/ciaa325 (2020).
- 910 40 Ryan, K. A. *et al.* Dose-dependent response to infection with SARS-CoV-2 in the ferret  
911 model and evidence of protective immunity. *Nat Commun* **12**, 81, doi:10.1038/s41467-  
912 020-20439-y (2021).
- 913 41 Kim, Y. I. *et al.* Infection and Rapid Transmission of SARS-CoV-2 in Ferrets. *Cell Host*  
914 *Microbe* **27**, 704-709 e702, doi:10.1016/j.chom.2020.03.023 (2020).
- 915 42 Melin, A. D., Janiak, M. C., Marrone, F., 3rd, Arora, P. S. & Higham, J. P. Comparative  
916 ACE2 variation and primate COVID-19 risk. *Commun Biol* **3**, 641, doi:10.1038/s42003-  
917 020-01370-w (2020).
- 918 43 Damas, J. *et al.* Broad host range of SARS-CoV-2 predicted by comparative and  
919 structural analysis of ACE2 in vertebrates. *Proc Natl Acad Sci U S A* **117**, 22311-22322,  
920 doi:10.1073/pnas.2010146117 (2020).
- 921 44 Munster, V. J. *et al.* Respiratory disease in rhesus macaques inoculated with SARS-CoV-  
922 2. *Nature* **585**, 268-272, doi:10.1038/s41586-020-2324-7 (2020).
- 923 45 Aid, M. *et al.* Vascular Disease and Thrombosis in SARS-CoV-2-Infected Rhesus  
924 Macaques. *Cell* **183**, 1354-1366 e1313, doi:10.1016/j.cell.2020.10.005 (2020).
- 925 46 Yu, P. *et al.* Age-related rhesus macaque models of COVID-19. *Animal Model Exp Med*  
926 **3**, 93-97, doi:10.1002/ame2.12108 (2020).
- 927 47 Singh, D. K. *et al.* Responses to acute infection with SARS-CoV-2 in the lungs of rhesus  
928 macaques, baboons and marmosets. *Nat Microbiol* **6**, 73-86, doi:10.1038/s41564-020-  
929 00841-4 (2021).
- 930 48 Blair, R. V. *et al.* Acute Respiratory Distress in Aged, SARS-CoV-2-Infected African  
931 Green Monkeys but Not Rhesus Macaques. *Am J Pathol* **191**, 274-282,  
932 doi:10.1016/j.ajpath.2020.10.016 (2021).
- 933 49 Rockx, B. *et al.* Comparative pathogenesis of COVID-19, MERS, and SARS in a  
934 nonhuman primate model. *Science* **368**, 1012-1015, doi:10.1126/science.abb7314 (2020).
- 935 50 Speranza, E. *et al.* Single-cell RNA sequencing reveals SARS-CoV-2 infection dynamics  
936 in lungs of African green monkeys. *Sci Transl Med* **13**,  
937 doi:10.1126/scitranslmed.abe8146 (2021).
- 938 51 Hartman, A. L. *et al.* SARS-CoV-2 infection of African green monkeys results in mild  
939 respiratory disease discernible by PET/CT imaging and shedding of infectious virus from  
940 both respiratory and gastrointestinal tracts. *PLoS Pathog* **16**, e1008903,  
941 doi:10.1371/journal.ppat.1008903 (2020).
- 942 52 Cross, R. W. *et al.* Intranasal exposure of African green monkeys to SARS-CoV-2 results  
943 in acute phase pneumonia with shedding and lung injury still present in the early  
944 convalescence phase. *Virology* **17**, 125, doi:10.1186/s12985-020-01396-w (2020).

- 945 53 Fahlberg, M. D. *et al.* Cellular events of acute, resolving or progressive COVID-19 in  
946 SARS-CoV-2 infected non-human primates. *Nat Commun* **11**, 6078, doi:10.1038/s41467-  
947 020-19967-4 (2020).
- 948 54 Stammes, M. A. *et al.* Medical imaging of pulmonary disease in SARS-CoV-2-exposed  
949 nonhuman primates. *Trends in Molecular Medicine*, doi:10.1016/j.molmed.2021.12.001  
950 (2021).
- 951 55 Corbett, K. S. *et al.* Evaluation of the mRNA-1273 Vaccine against SARS-CoV-2 in  
952 Nonhuman Primates. *N Engl J Med* **383**, 1544-1555, doi:10.1056/NEJMoa2024671  
953 (2020).
- 954 56 Corbett, K. S. *et al.* Immune correlates of protection by mRNA-1273 vaccine against  
955 SARS-CoV-2 in nonhuman primates. *Science* **373**, eabj0299,  
956 doi:10.1126/science.abj0299 (2021).
- 957 57 Corbett, K. S. *et al.* mRNA-1273 protects against SARS-CoV-2 beta infection in  
958 nonhuman primates. *Nat Immunol* **22**, 1306-1315, doi:10.1038/s41590-021-01021-0  
959 (2021).
- 960 58 Yu, J. *et al.* DNA vaccine protection against SARS-CoV-2 in rhesus macaques. *Science*  
961 **369**, 806-811, doi:10.1126/science.abc6284 (2020).
- 962 59 Mercado, N. B. *et al.* Single-shot Ad26 vaccine protects against SARS-CoV-2 in rhesus  
963 macaques. *Nature* **586**, 583-588, doi:10.1038/s41586-020-2607-z (2020).
- 964 60 McMahan, K. *et al.* Correlates of protection against SARS-CoV-2 in rhesus macaques.  
965 *Nature* **590**, 630-634, doi:10.1038/s41586-020-03041-6 (2021).
- 966 61 van Doremalen, N. *et al.* ChAdOx1 nCoV-19 vaccine prevents SARS-CoV-2 pneumonia  
967 in rhesus macaques. *Nature* **586**, 578-582, doi:10.1038/s41586-020-2608-y (2020).
- 968 62 Deng, W. *et al.* Primary exposure to SARS-CoV-2 protects against reinfection in rhesus  
969 macaques. *Science* **369**, 818-823, doi:10.1126/science.abc5343 (2020).
- 970 63 Chandrashekar, A. *et al.* SARS-CoV-2 infection protects against rechallenge in rhesus  
971 macaques. *Science* **369**, 812-817, doi:10.1126/science.abc4776 (2020).
- 972 64 Chandrashekar, A. *et al.* Prior infection with SARS-CoV-2 WA1/2020 partially protects  
973 rhesus macaques against reinfection with B.1.1.7 and B.1.351 variants. *Sci Transl Med*  
974 **13**, eabj2641, doi:10.1126/scitranslmed.abj2641 (2021).
- 975 65 Hasenkrug, K. J. *et al.* Recovery from Acute SARS-CoV-2 Infection and Development of  
976 Anamnestic Immune Responses in T Cell-Depleted Rhesus Macaques. *mBio* **12**,  
977 e0150321, doi:10.1128/mBio.01503-21 (2021).
- 978 66 Kvedaraitė, E. *et al.* Major alterations in the mononuclear phagocyte landscape associated  
979 with COVID-19 severity. *Proc Natl Acad Sci U S A* **118**, doi:10.1073/pnas.2018587118  
980 (2021).
- 981 67 Xu, G. *et al.* The differential immune responses to COVID-19 in peripheral and lung  
982 revealed by single-cell RNA sequencing. *Cell Discov* **6**, 73, doi:10.1038/s41421-020-  
983 00225-2 (2020).
- 984 68 Collin, M. & Bigley, V. Human dendritic cell subsets: an update. *Immunology* **154**, 3-20,  
985 doi:10.1111/imm.12888 (2018).
- 986 69 Grifoni, A. *et al.* A Sequence Homology and Bioinformatic Approach Can Predict  
987 Candidate Targets for Immune Responses to SARS-CoV-2. *Cell Host Microbe* **27**, 671-  
988 680 e672, doi:10.1016/j.chom.2020.03.002 (2020).

- 989 70 Grifoni, A. *et al.* Targets of T Cell Responses to SARS-CoV-2 Coronavirus in Humans  
990 with COVID-19 Disease and Unexposed Individuals. *Cell* **181**, 1489-1501 e1415,  
991 doi:10.1016/j.cell.2020.05.015 (2020).
- 992 71 Beura, L. K. *et al.* CD4(+) resident memory T cells dominate immunosurveillance and  
993 orchestrate local recall responses. *J Exp Med* **216**, 1214-1229, doi:10.1084/jem.20181365  
994 (2019).
- 995 72 Kumar, B. V. *et al.* Human Tissue-Resident Memory T Cells Are Defined by Core  
996 Transcriptional and Functional Signatures in Lymphoid and Mucosal Sites. *Cell Rep* **20**,  
997 2921-2934, doi:10.1016/j.celrep.2017.08.078 (2017).
- 998 73 Anderson, K. G. *et al.* Cutting edge: intravascular staining redefines lung CD8 T cell  
999 responses. *J Immunol* **189**, 2702-2706, doi:10.4049/jimmunol.1201682 (2012).
- 1000 74 Kauffman, K. D. *et al.* Defective positioning in granulomas but not lung-homing limits  
1001 CD4 T-cell interactions with Mycobacterium tuberculosis-infected macrophages in  
1002 rhesus macaques. *Mucosal Immunol* **11**, 462-473, doi:10.1038/mi.2017.60 (2018).
- 1003 75 Potter, E. L. *et al.* Measurement of leukocyte trafficking kinetics in macaques by serial  
1004 intravascular staining. *Sci Transl Med* **13**, doi:10.1126/scitranslmed.abb4582 (2021).
- 1005 76 Dan, J. M. *et al.* Immunological memory to SARS-CoV-2 assessed for up to 8 months  
1006 after infection. *Science* **371**, doi:10.1126/science.abf4063 (2021).
- 1007 77 Nomura, T. *et al.* Subacute SARS-CoV-2 replication can be controlled in the absence of  
1008 CD8+ T cells in cynomolgus macaques. *PLoS Pathog* **17**, e1009668,  
1009 doi:10.1371/journal.ppat.1009668 (2021).
- 1010 78 Israelow, B. *et al.* Adaptive immune determinants of viral clearance and protection in  
1011 mouse models of SARS-CoV-2. *Sci Immunol* **6**, eabl4509,  
1012 doi:10.1126/sciimmunol.abl4509 (2021).
- 1013 79 Brocato, R. L. *et al.* Disruption of Adaptive Immunity Enhances Disease in SARS-CoV-  
1014 2-Infected Syrian Hamsters. *J Virol* **94**, doi:10.1128/JVI.01683-20 (2020).
- 1015 80 Horiuchi, S. *et al.* Immune memory from SARS-CoV-2 infection in hamsters provides  
1016 variant-independent protection but still allows virus transmission. *Sci Immunol*,  
1017 eabm3131, doi:10.1126/sciimmunol.abm3131 (2021).
- 1018 81 Heitmann, J. S. *et al.* A COVID-19 peptide vaccine for the induction of SARS-CoV-2 T  
1019 cell immunity. *Nature*, doi:10.1038/s41586-021-04232-5 (2021).
- 1020 82 Noh, J. Y., Jeong, H. W., Kim, J. H. & Shin, E. C. T cell-oriented strategies for  
1021 controlling the COVID-19 pandemic. *Nat Rev Immunol* **21**, 687-688,  
1022 doi:10.1038/s41577-021-00625-9 (2021).
- 1023 83 Tarke, A. *et al.* Impact of SARS-CoV-2 variants on the total CD4(+) and CD8(+) T cell  
1024 reactivity in infected or vaccinated individuals. *Cell Rep Med* **2**, 100355,  
1025 doi:10.1016/j.xcrm.2021.100355 (2021).
- 1026 84 Kauffman, K. D. *et al.* PD-1 blockade exacerbates Mycobacterium tuberculosis infection  
1027 in rhesus macaques. *Sci Immunol* **6**, doi:10.1126/sciimmunol.abf3861 (2021).
- 1028 85 Beites, T. *et al.* Plasticity of the Mycobacterium tuberculosis respiratory chain and its  
1029 impact on tuberculosis drug development. *Nat Commun* **10**, 4970, doi:10.1038/s41467-  
1030 019-12956-2 (2019).
- 1031 86 Sakai, S. *et al.* Functional inactivation of pulmonary MAIT cells following 5-OP-RU  
1032 treatment of non-human primates. *Mucosal Immunol* **14**, 1055-1066, doi:10.1038/s41385-  
1033 021-00425-3 (2021).

1034 87 Stoeckius, M. *et al.* Cell Hashing with barcoded antibodies enables multiplexing and  
1035 doublet detection for single cell genomics. *Genome Biol* **19**, 224, doi:10.1186/s13059-  
1036 018-1603-1 (2018).  
1037



# Figure 1

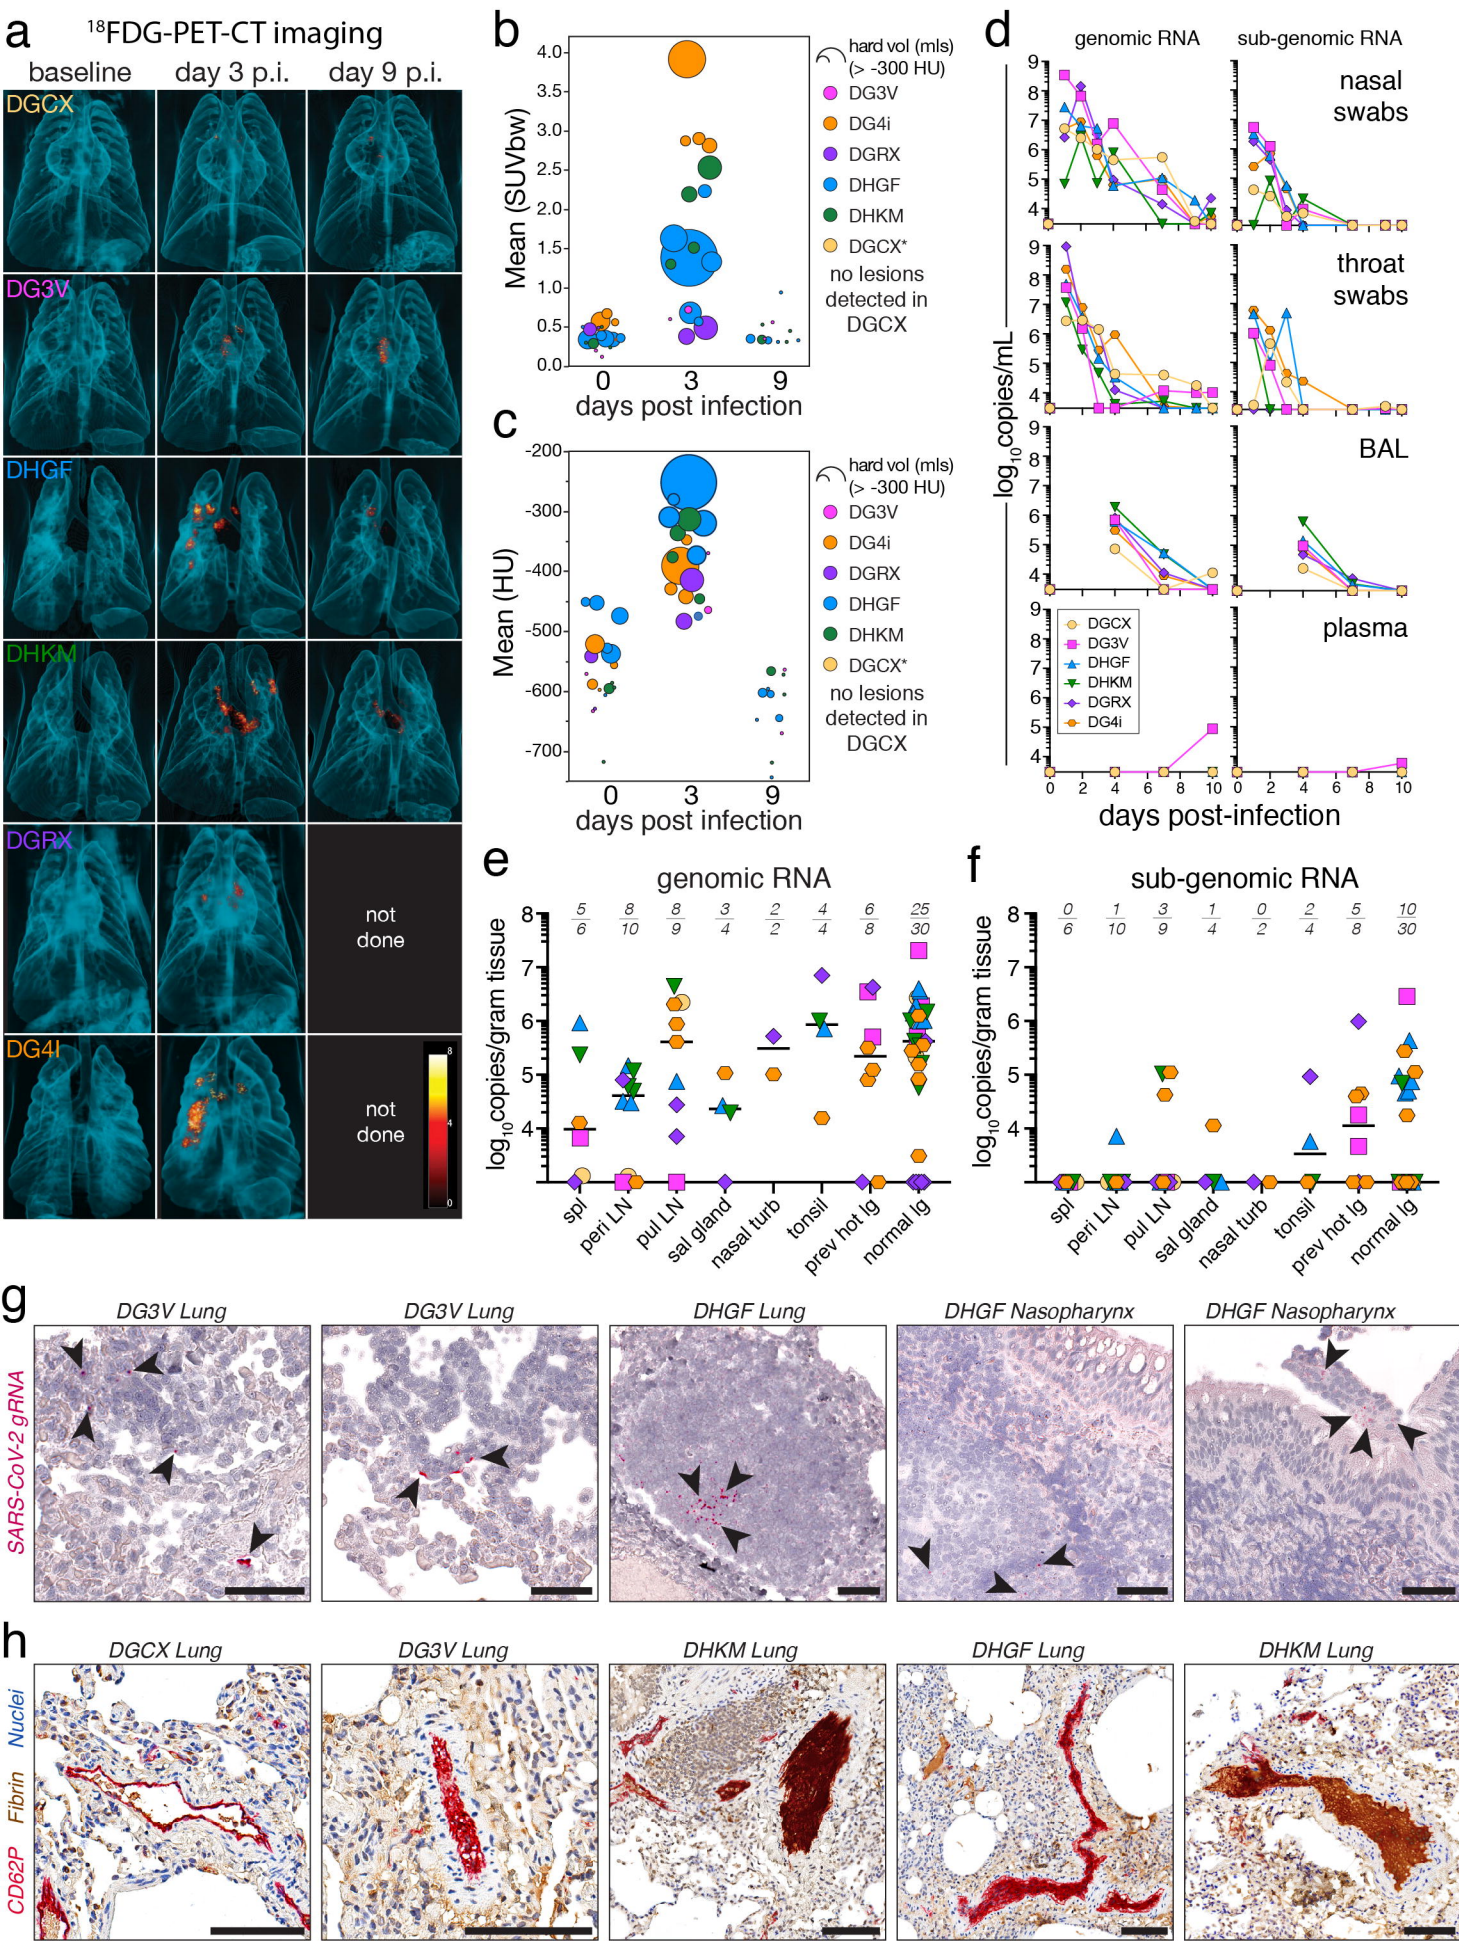

**Figure 2****a**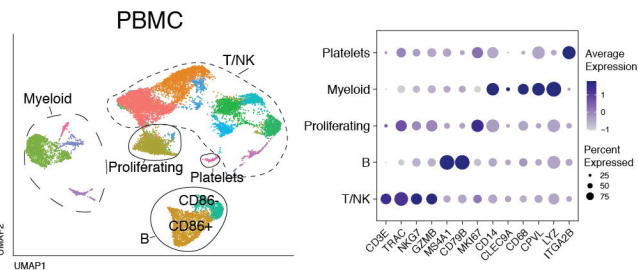**b**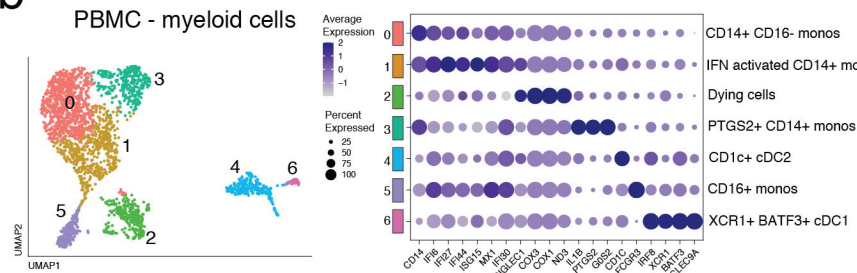**c**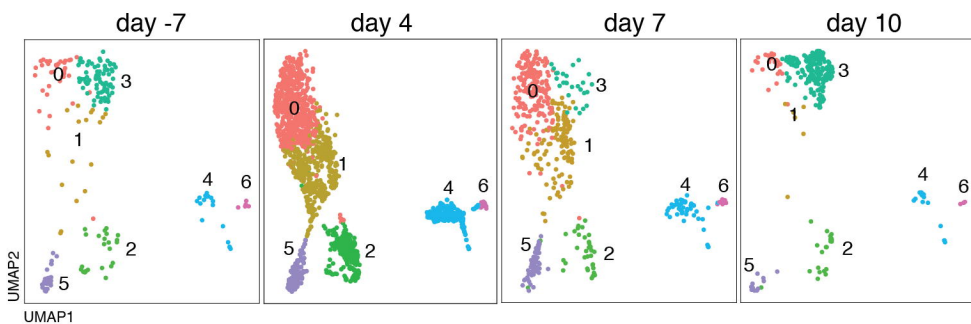**d**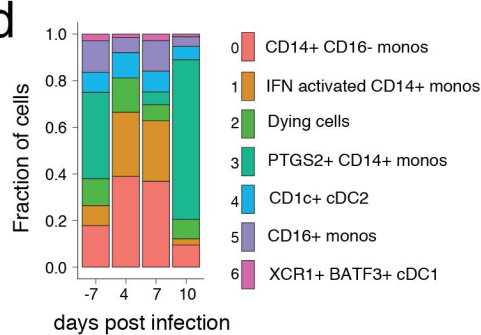**e****PBMC myeloid 0 - CD14+ CD16- monos**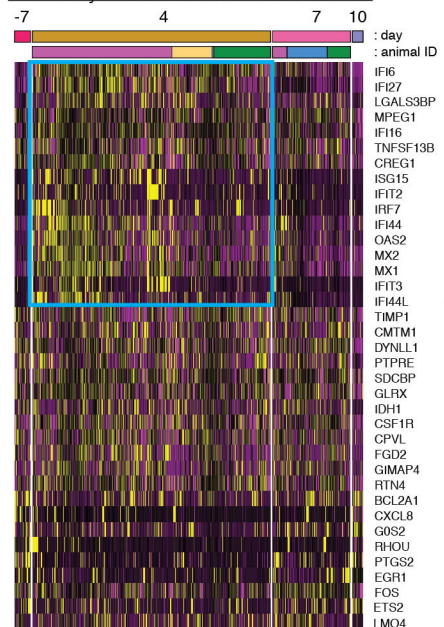**f****PBMC myeloid 1 - IFN activated monos**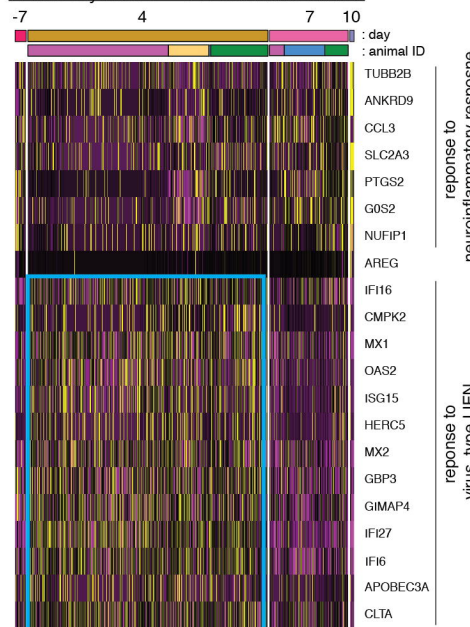**g****PBMC myeloid 3 - PTGS2+ CD14+ monos**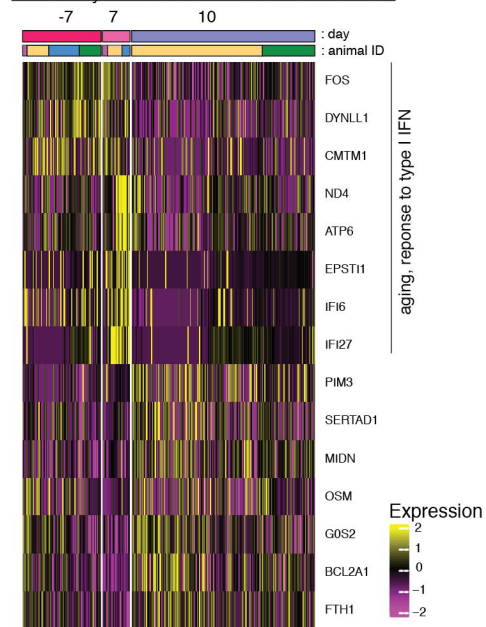

Day : -7 4 7 10

Animal: DG3V DGCX DHGF DHKM

**Figure 3**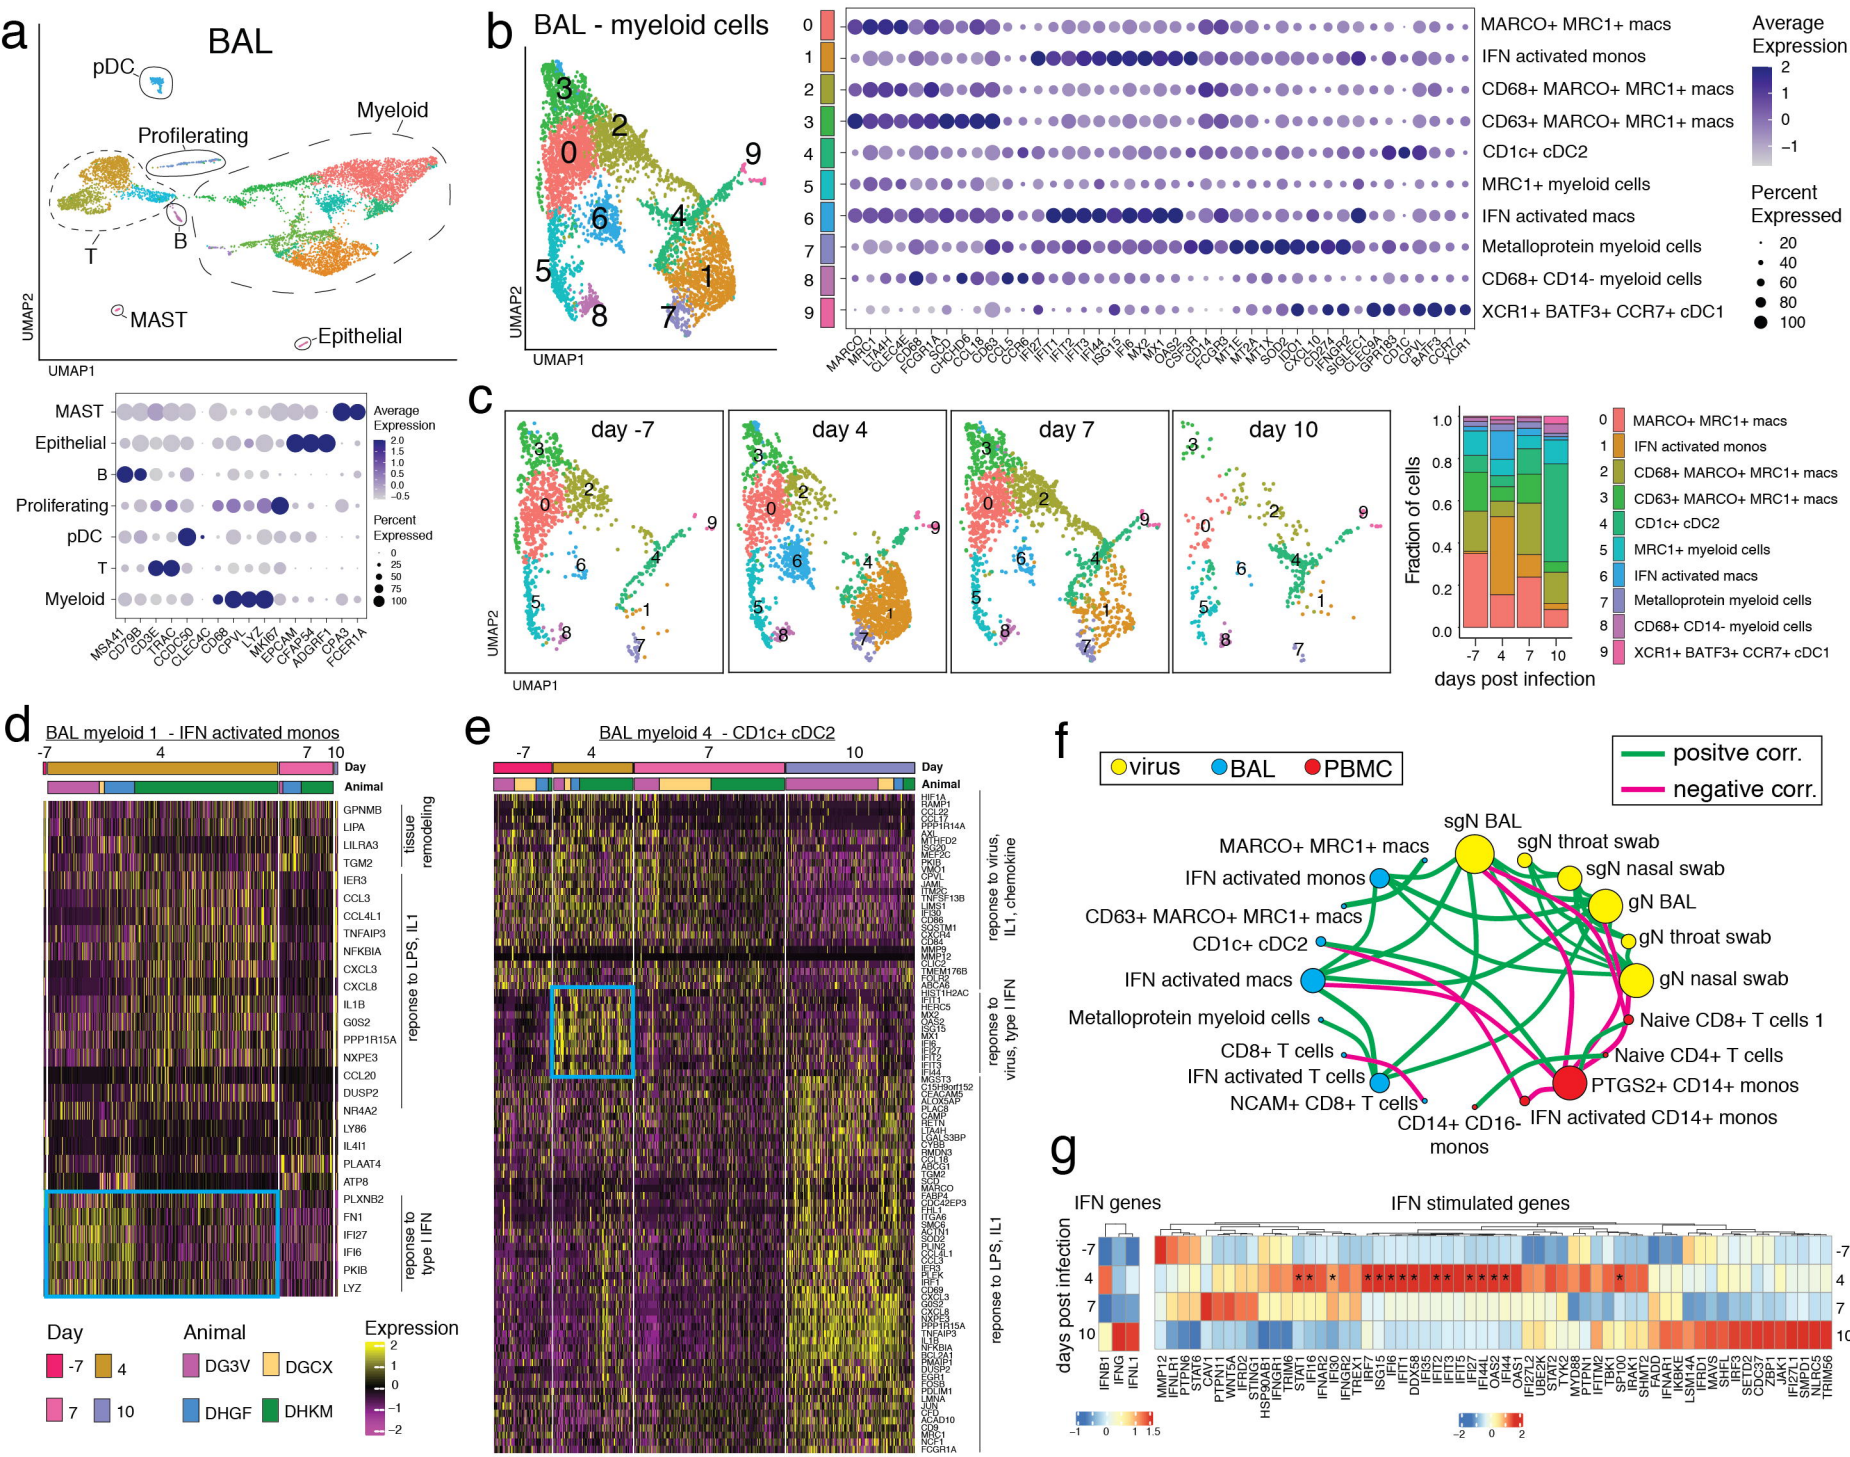

**Figure 4**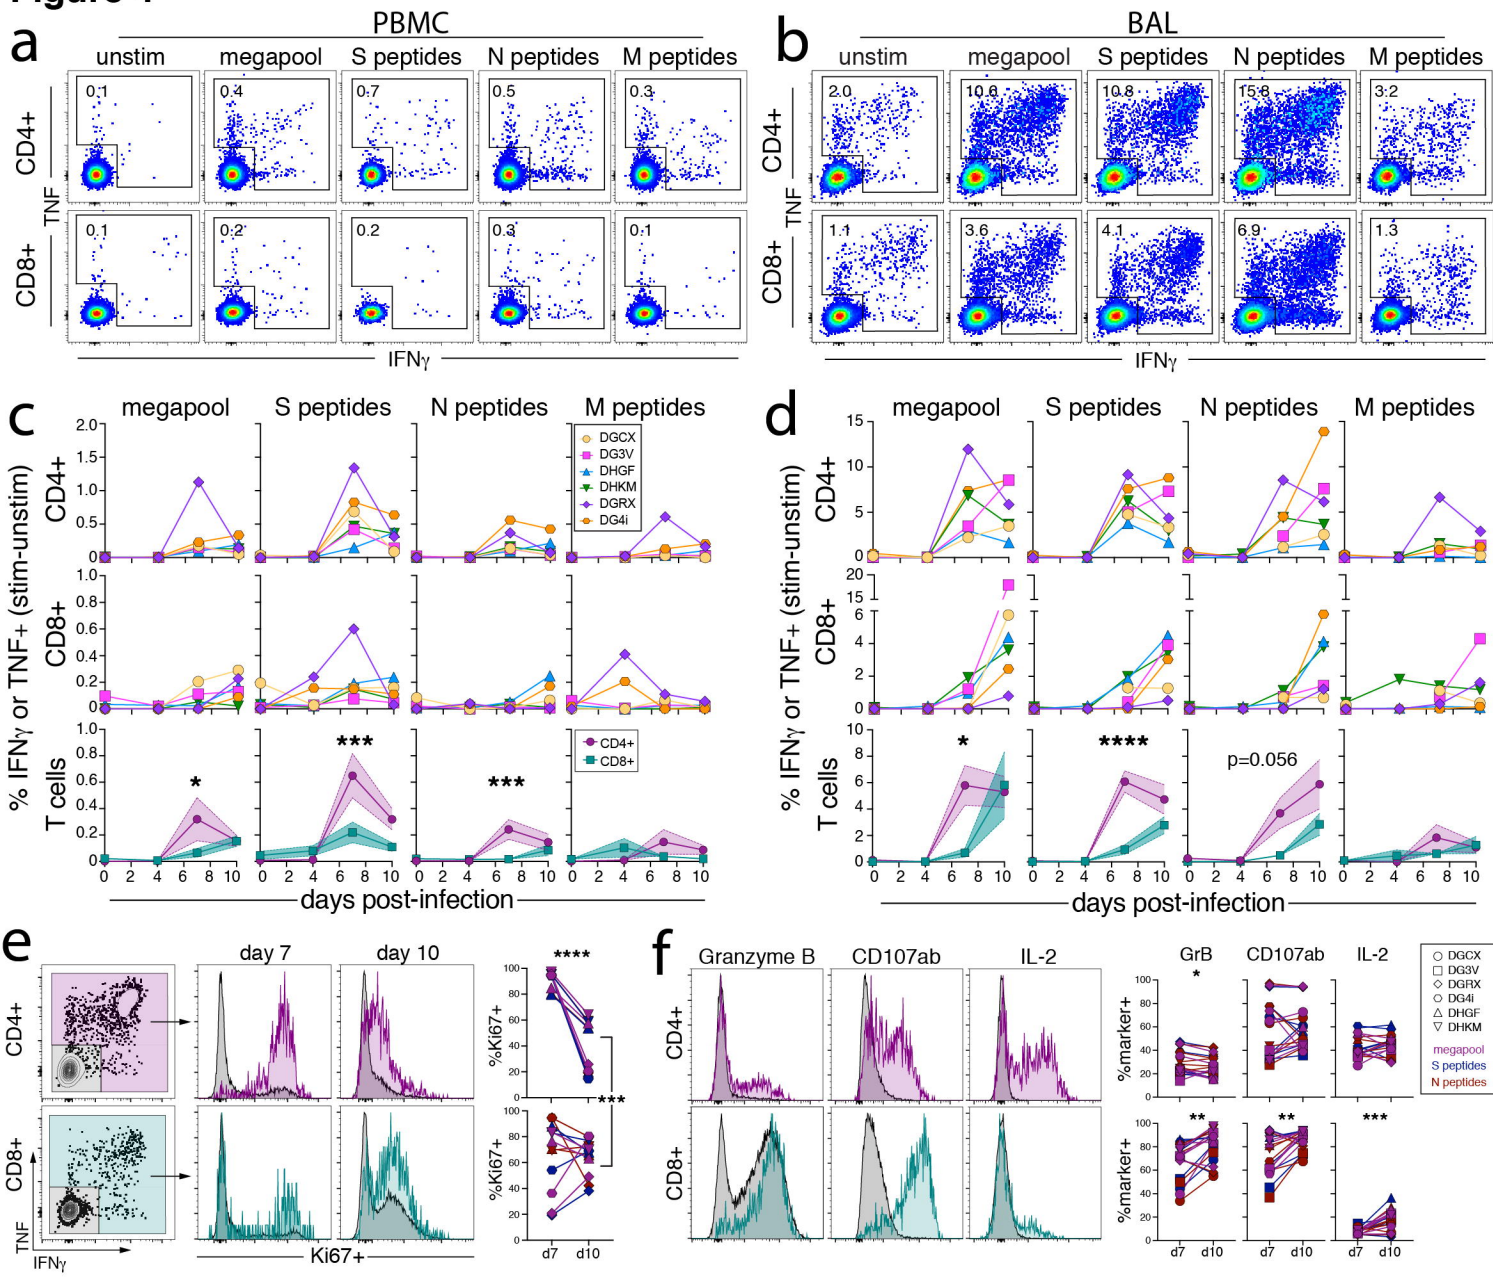

**Figure 5****a**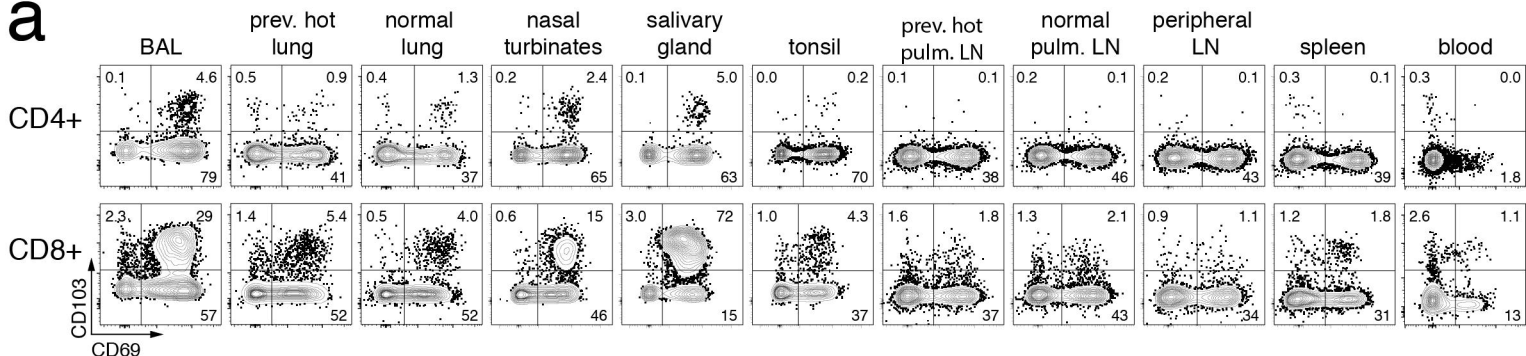**b**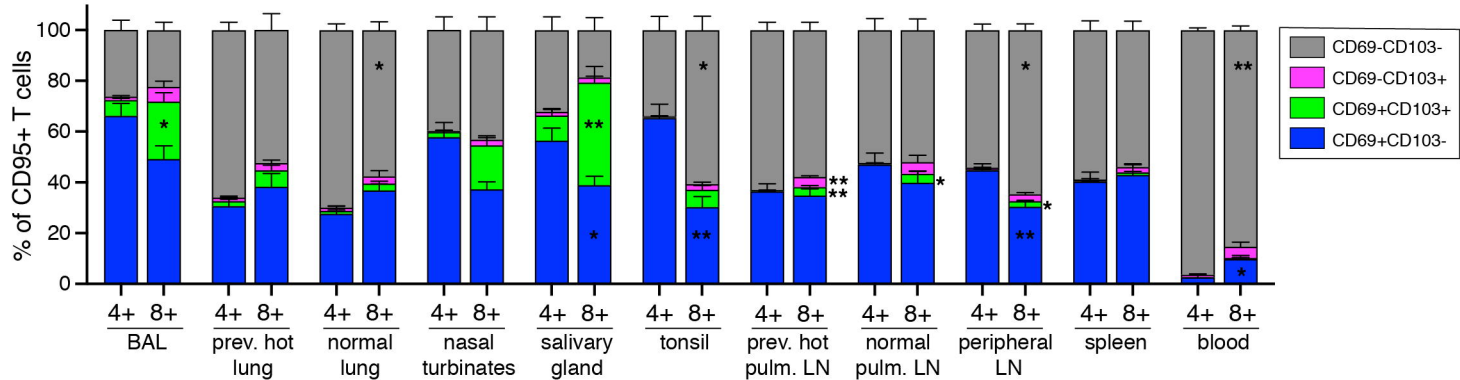**c**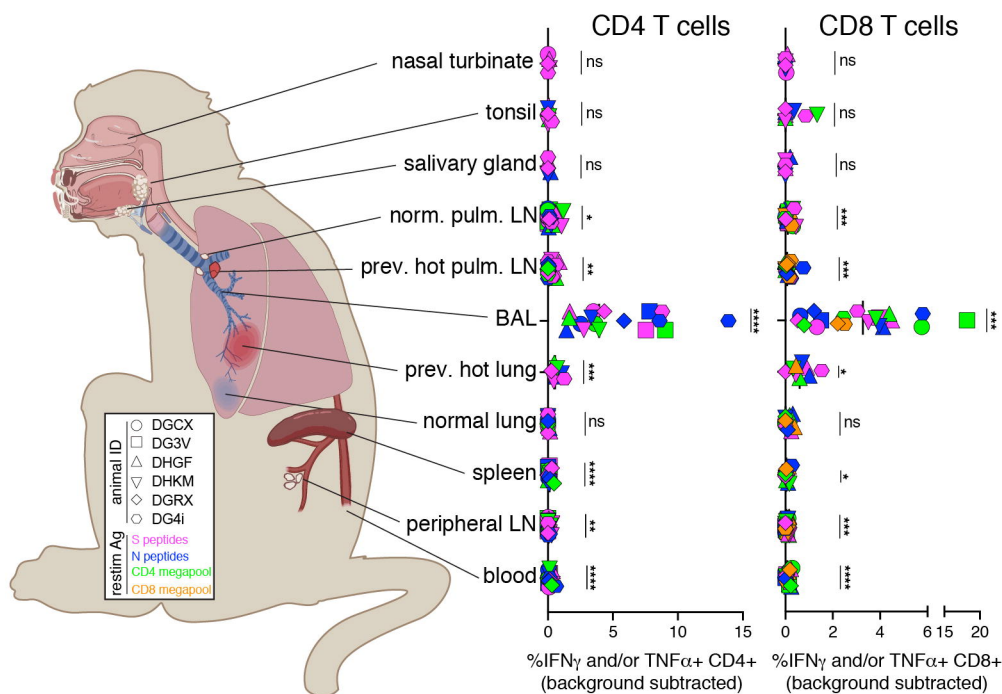**d**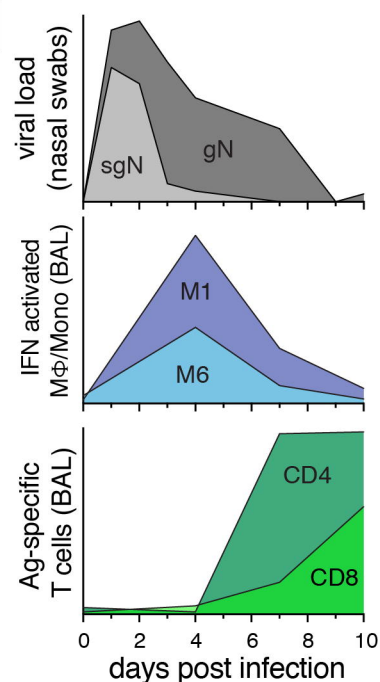

# Supplemental Figure 1

**a**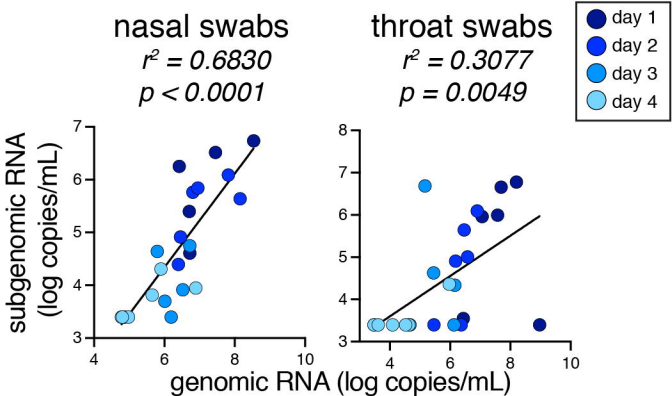**b**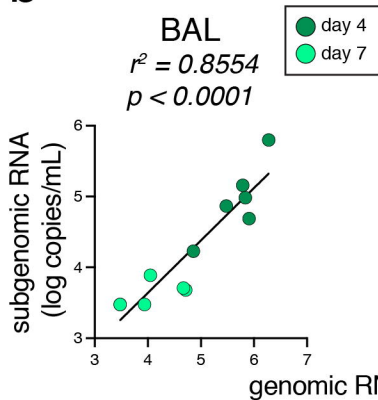**c**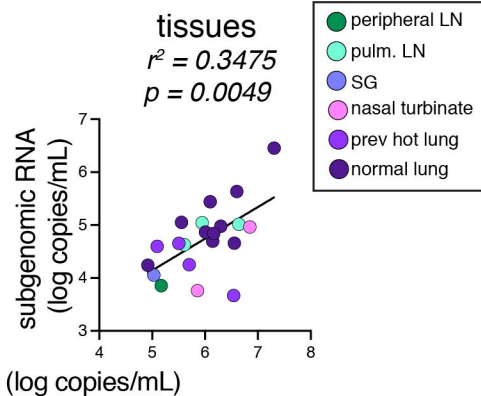**d**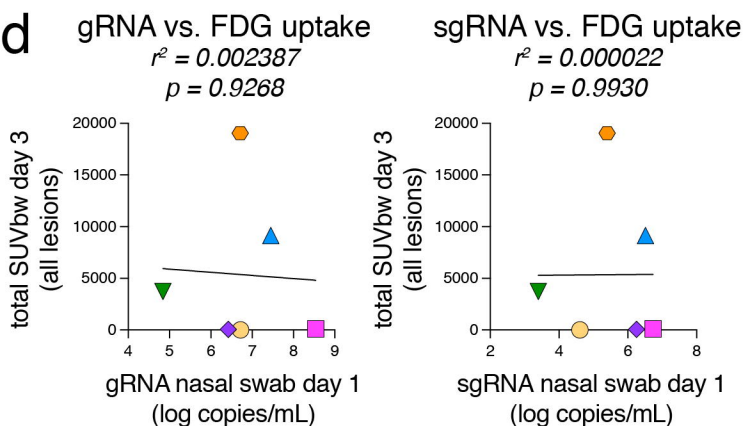**e**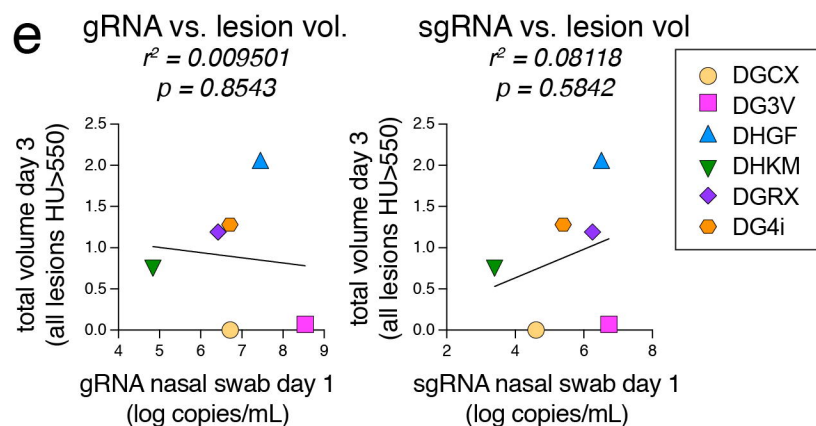**f**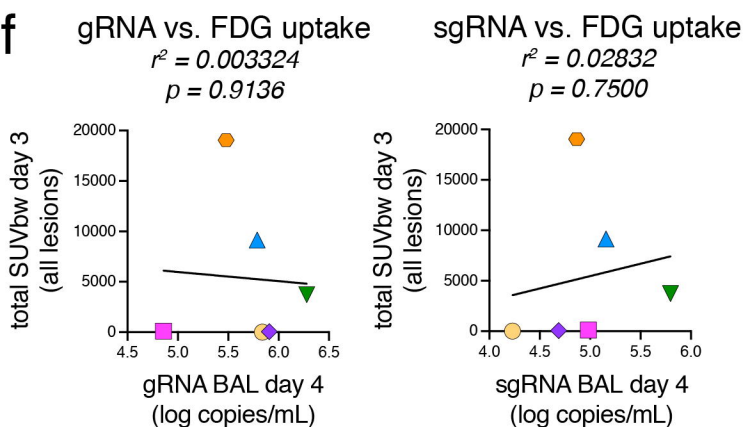**g**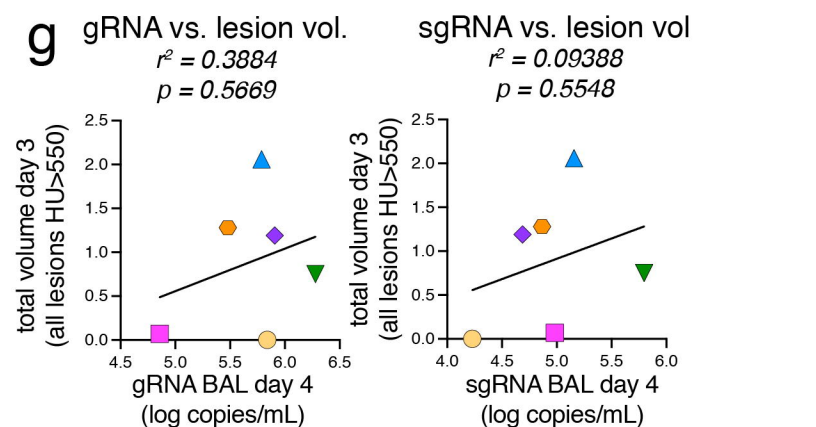

# Supplemental Figure 2

## a PBMC - T/NK cells

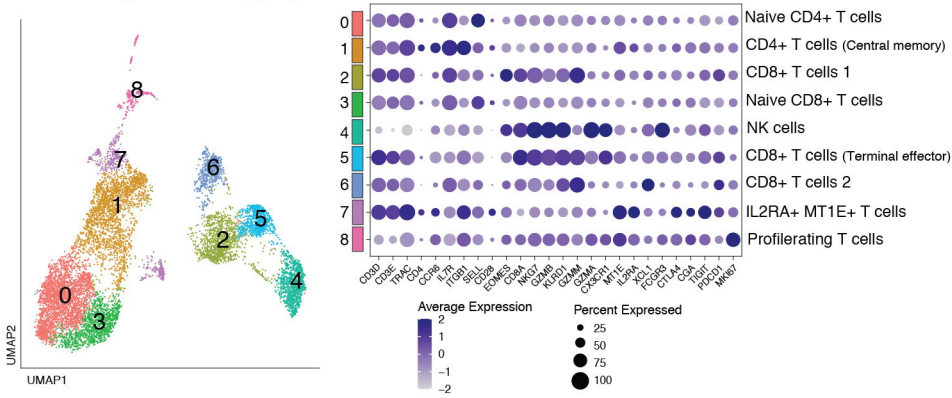

## b

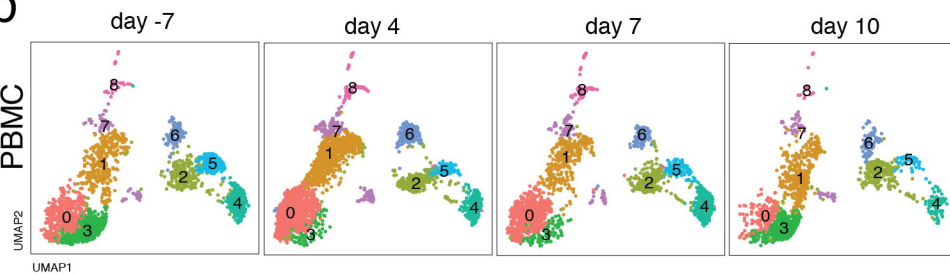

## d

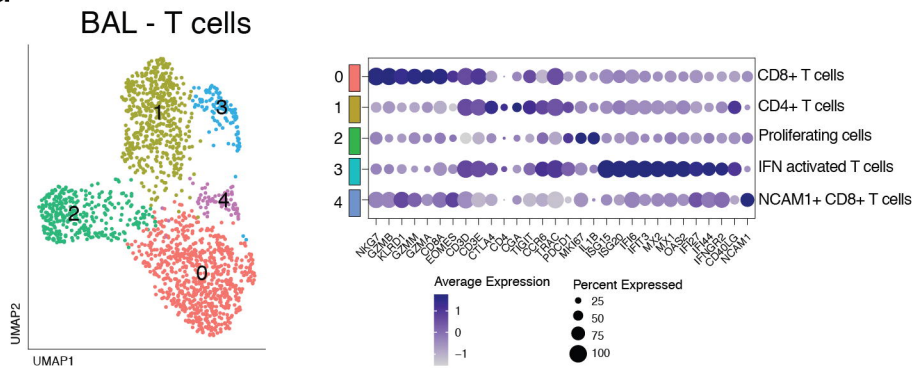

## e

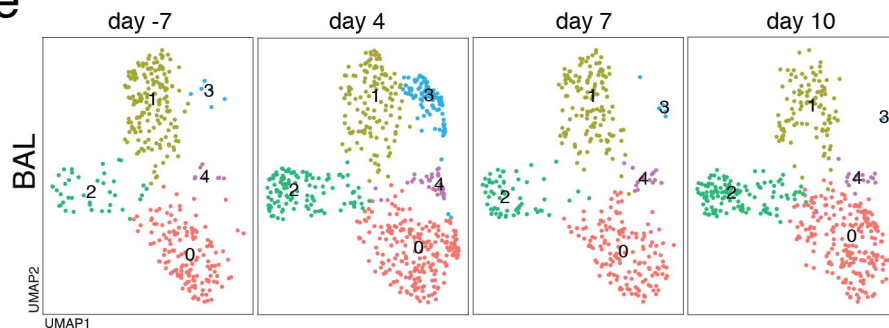

## c

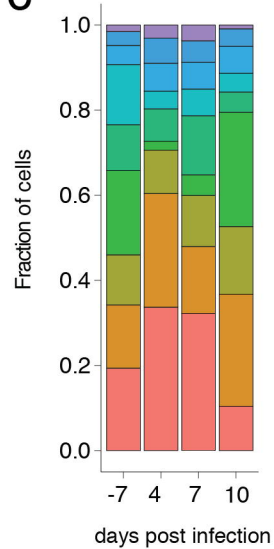

## f

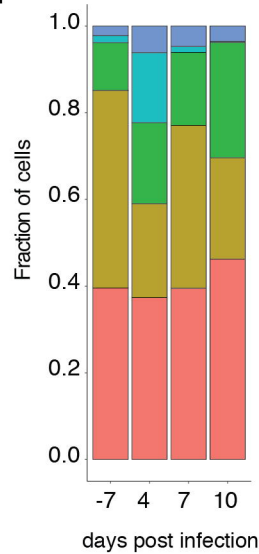

**a**

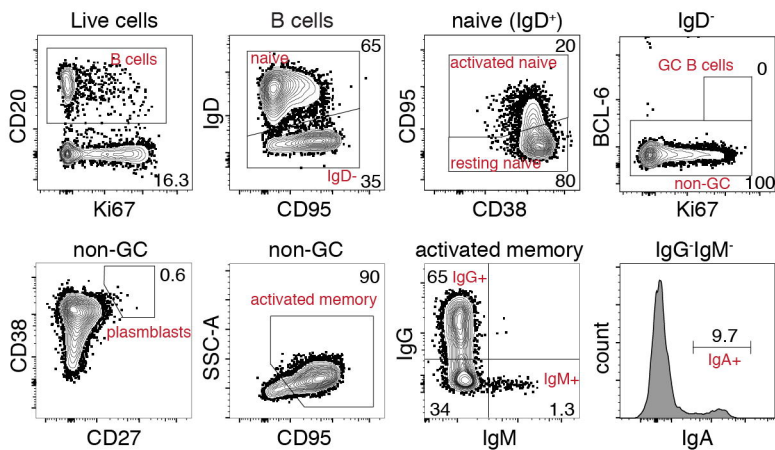

**b**

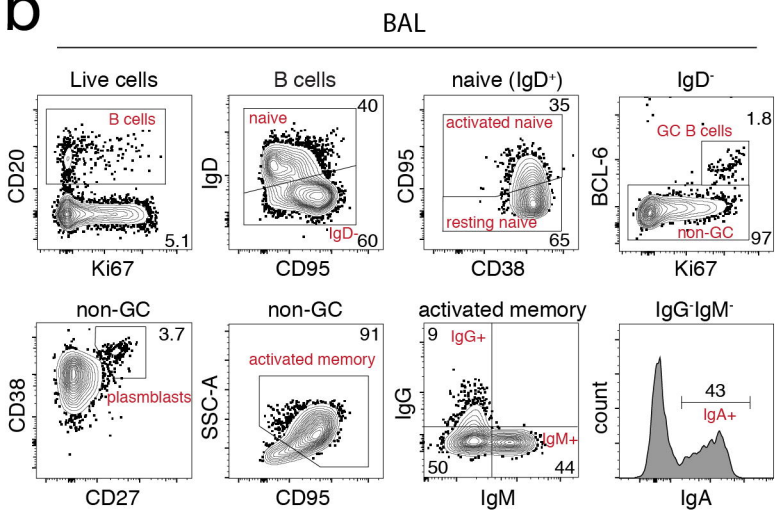

**f**

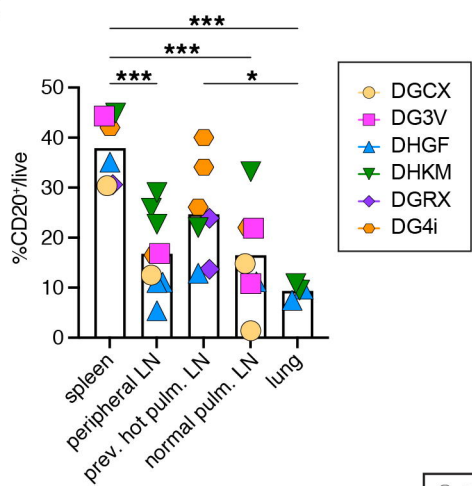

**i**

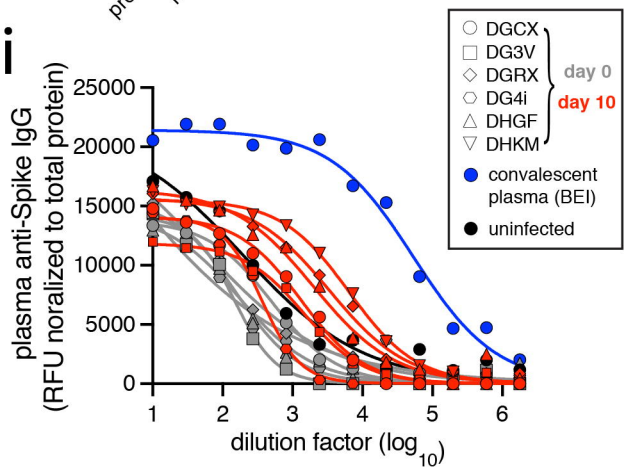

**c**

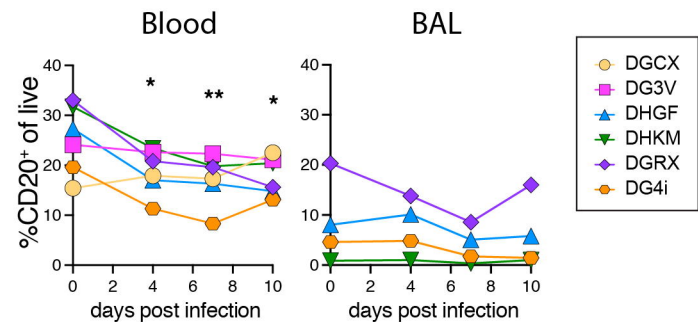

**d**

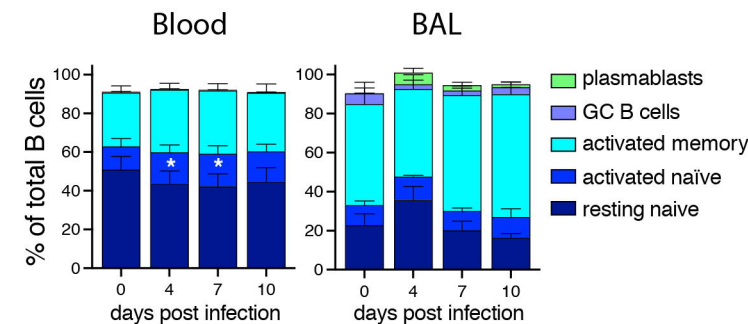

**e**

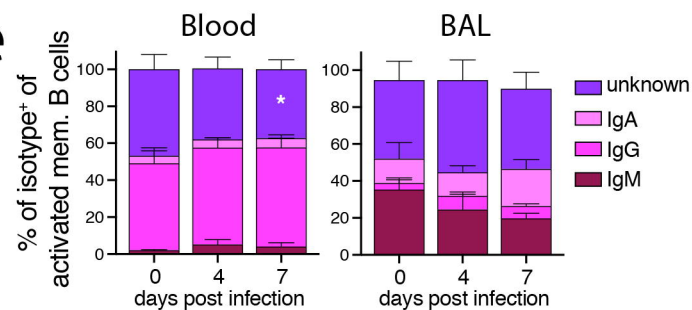

**g**

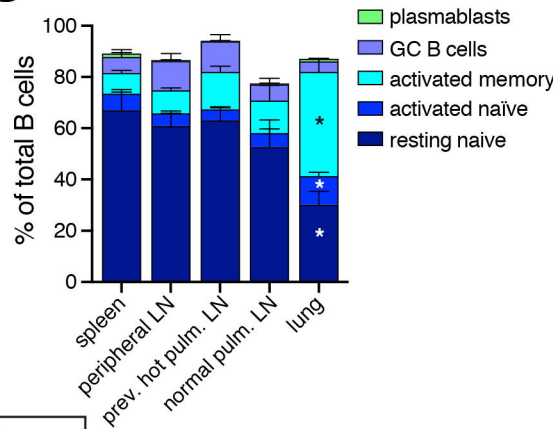

**h**

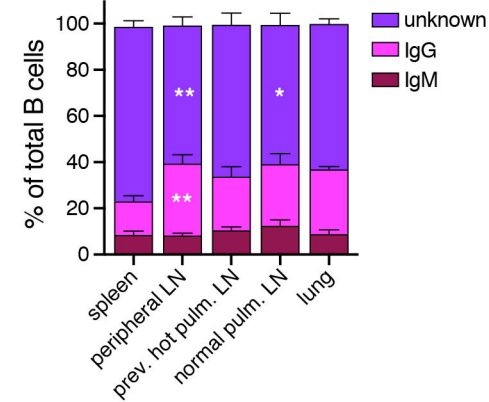

**j**

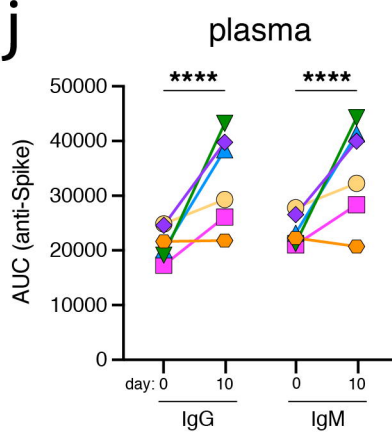

**k**

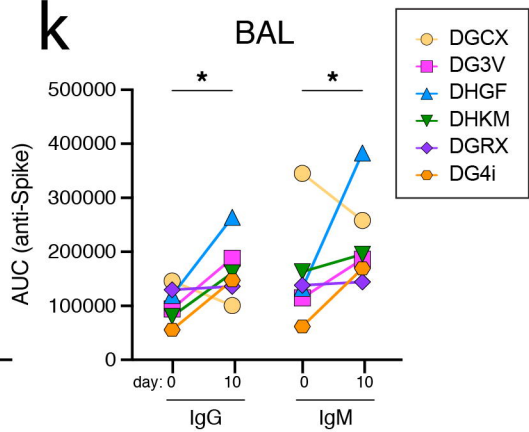



# Supplemental Figure 4

## a

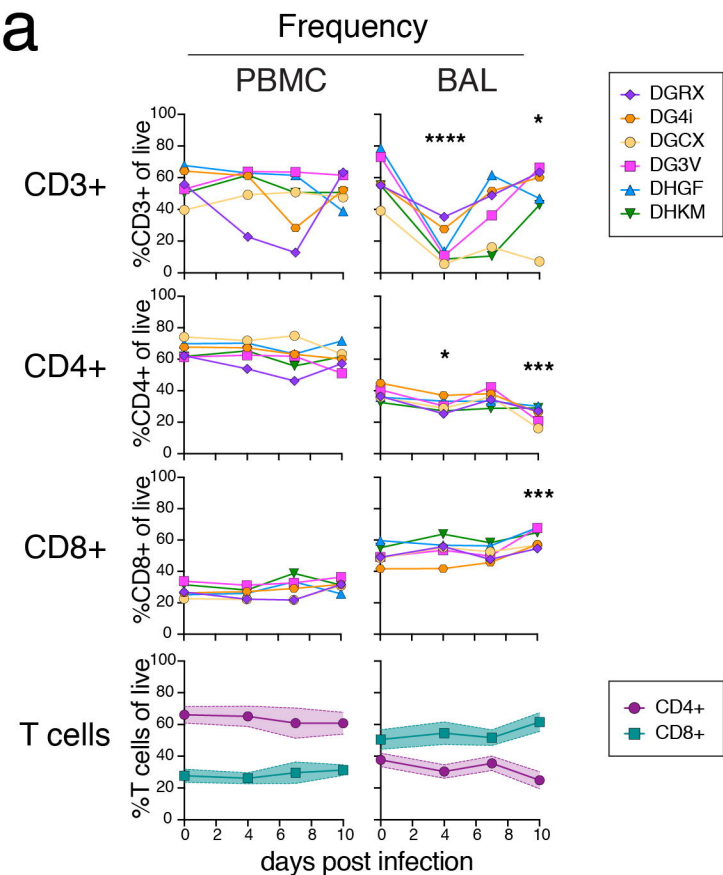

## b

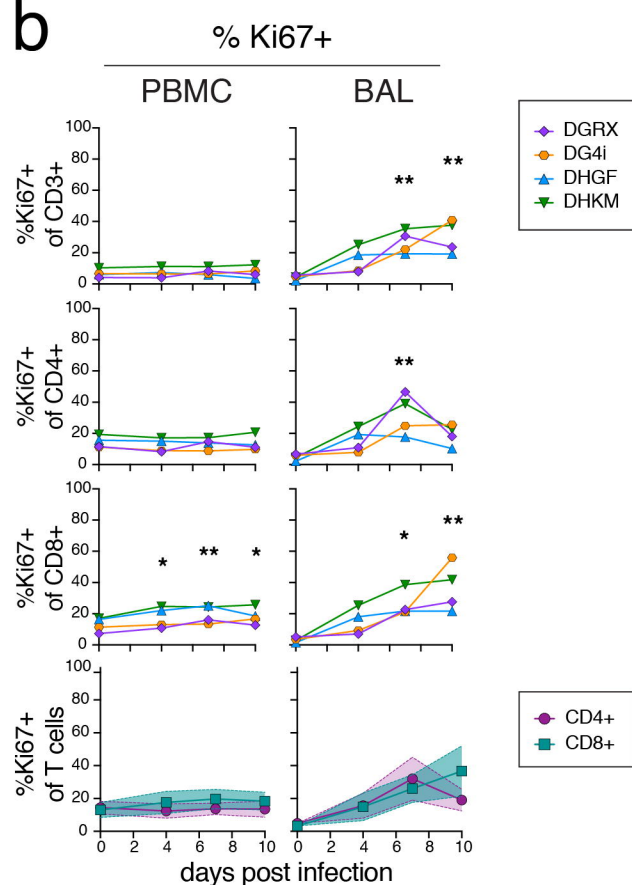

## c

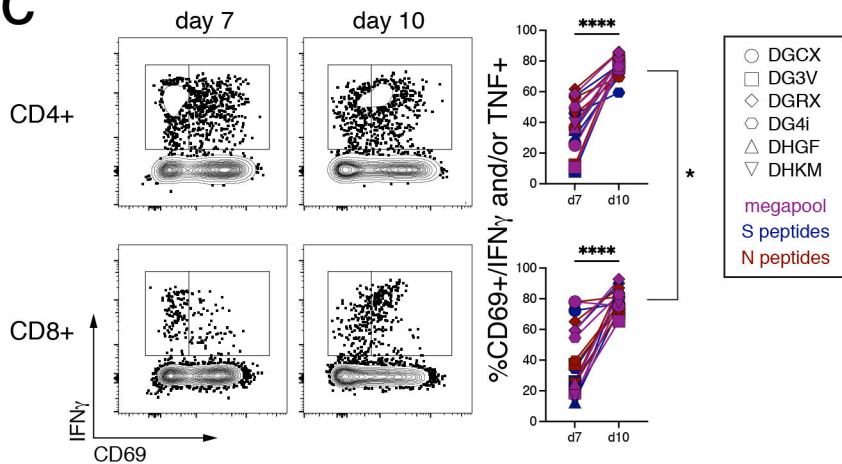

## d

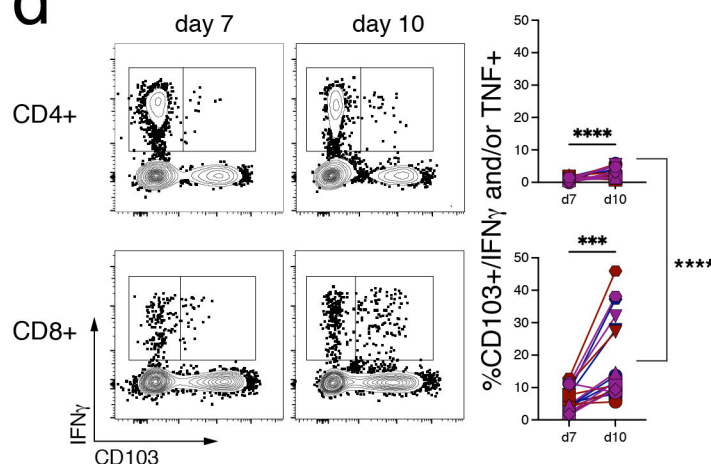

Supplemental Figure 5

a

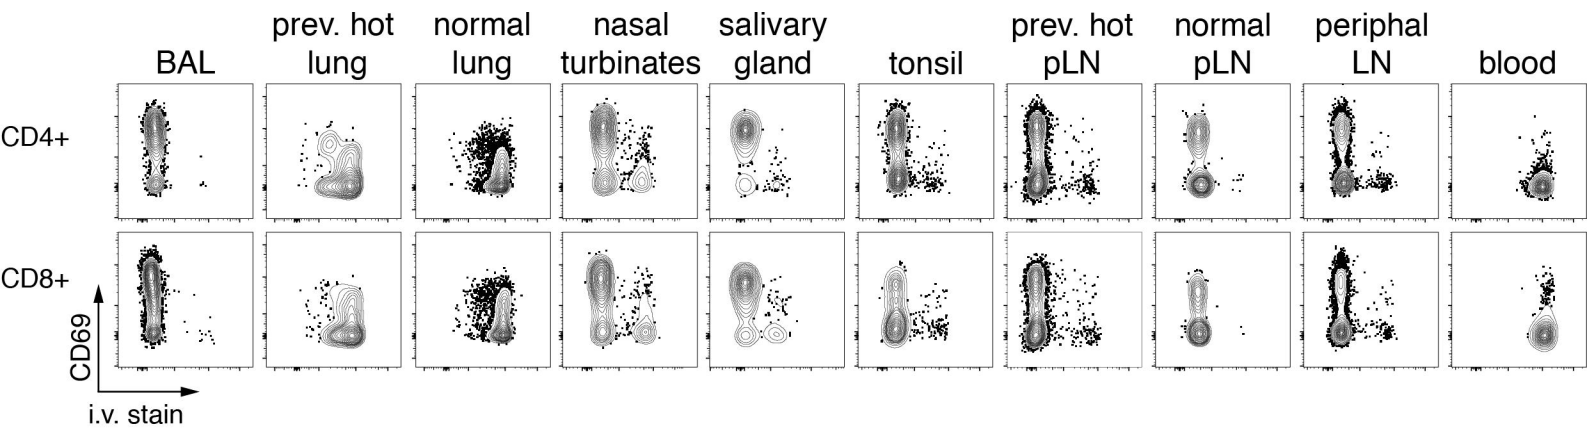

b

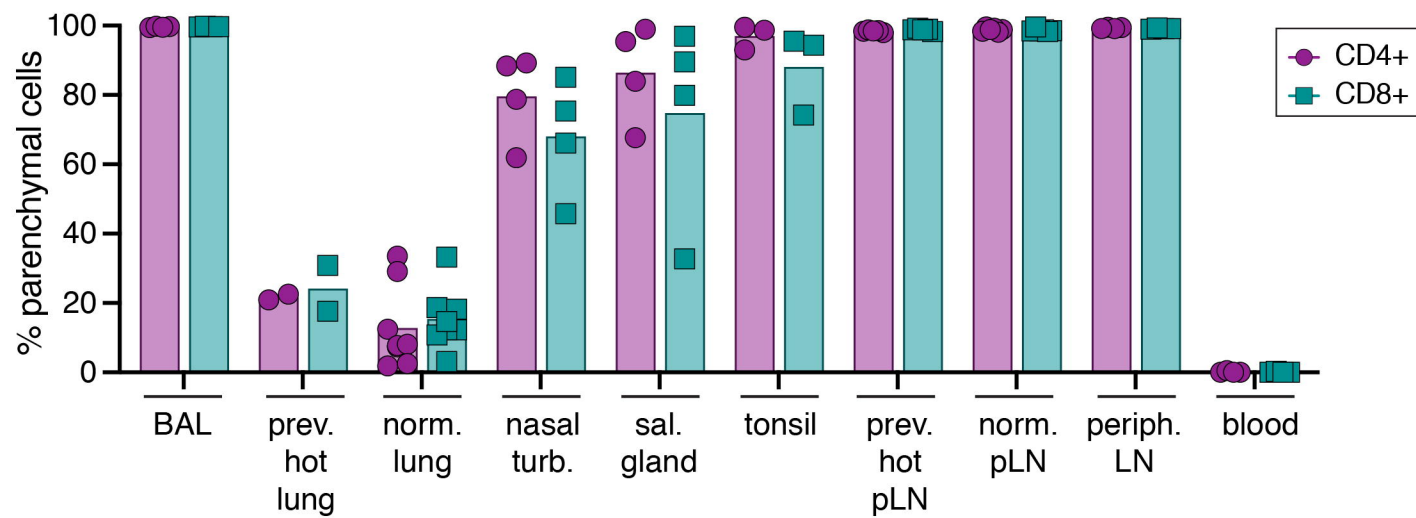

Source: http://biorxiv.org/content/10.1101/2022.01.06.475282v1.full.pdf
